# 1 **Efficient breeding of industrial brewing yeast strains using CRISPR/Cas9-aided mating-type** 2 **switching**

3 Kristoffer Krogerus<sup>1\*</sup>, Eugene Fletcher<sup>2</sup>, Nils Rettberg<sup>3</sup>, Brian Gibson<sup>4</sup>, Richard Preiss<sup>2</sup>

4 <sup>1</sup> VTT Technical Research Centre of Finland, Tietotie 2, P.O. Box 1000, FI-02044 VTT, Espoo,  
5 Finland

6 <sup>2</sup> Escarpment Laboratories, Guelph, ON, Canada

7 <sup>3</sup> Research Institute for Beer and Beverage Analysis, Versuchs- und Lehranstalt für Brauerei in Berlin  
8 (VLB) e.V., Seestr. 13, 13353 Berlin, Germany

9 <sup>4</sup> Chair of Brewing and Beverage Technology, Technische Universität Berlin, Berlin, Germany

10 \* Address correspondence to Kristoffer Krogerus, [kristoffer.krogerus@vtt.fi](mailto:kristoffer.krogerus@vtt.fi)

## 11 **Abstract**

12 Yeast breeding is a powerful tool for developing and improving brewing yeast in a number of industry-  
13 relevant respects. However, breeding of industrial brewing yeast can be challenging, as strains are  
14 typically sterile and have large complex genomes. To facilitate breeding, we used the CRISPR/Cas9  
15 system to generate double-stranded breaks in the *MAT* locus, generating transformants with a single  
16 specified mating type. The single mating type remained stable even after loss of the Cas9 plasmid,  
17 despite the strains being homothallic, and these strains could be readily mated with other brewing  
18 yeast transformants of opposite mating type. As a proof of concept, we applied this technology to  
19 generate yeast hybrids with an aim to increase  $\beta$ -lyase activity for fermentation of beer with  
20 enhanced hop flavour. First, a genetic and phenotypic pre-screening of 38 strains was carried out in  
21 order to identify potential parent strains with high  $\beta$ -lyase activity. Mating-competent transformants  
22 of eight parent strains were generated, and these were used to generate over 60 hybrids that were  
23 screened for  $\beta$ -lyase activity. Selected phenolic off-flavour positive (POF+) hybrids were further  
24 sporulated to generate meiotic segregants with high  $\beta$ -lyase activity, efficient wort fermentation and  
25 lack of POF; all traits that are desirable in strains for the fermentation of modern hop-forward beers.  
26 Our study demonstrates the power of combining the CRISPR/Cas9 system with classic yeast  
27 breeding to facilitate development and diversification of brewing yeast.

## 28 **Key Points**

- 29 • CRISPR/Cas9-based mating type switching was applied to industrial yeast strains
- 30 • Transformed strains could be readily mated to form intraspecific hybrids
- 31 • Hybrids exhibited heterosis for a number of brewing-relevant traits

## 32 **Introduction**

33 The number of breweries and beer brands globally has expanded dramatically in recent decades  
34 (Garavaglia and Swinnen 2018). Consumers are also demanding higher product quality and beer  
35 with novel and diverse flavours (Aquilani et al. 2015; Carbone and Quici 2020; Gonzalez Viejo and  
36 Fuentes 2020). As much of beer flavour is yeast-derived (Holt et al. 2019), brewers may meet this  
37 demand and keep ahead of competition by diversifying their products through the use of different  
38 yeast strains. While a large and diverse range of yeast strains are naturally available, recent studies  
39 have shown that the vast majority of industrially used brewing strains group into one of two  
40 domesticated clades (Gallone et al. 2016; Gonçalves et al. 2016; Peter et al. 2018). These strains  
41 have evolved to efficiently ferment the complex sugars available in brewer's wort. Non-brewing  
42 strains may therefore have difficulties completing fermentation in wort. Yeast breeding and  
43 hybridization has been shown to be a promising tool for developing and improving brewing yeast in  
44 a number of industry-relevant respects (Steensels et al. 2014; Krogerus et al. 2015; Mertens et al.  
45 2015; Krogerus et al. 2016). It allows for the combination and enhancement of phenotypic traits from  
46 diverse sets of strains. Hybrids between *Saccharomyces cerevisiae* brewing strains and wild  
47 *Saccharomyces* strains, for example, have shown both efficient wort fermentation and a more  
48 diverse aroma profile (Mertens et al. 2015; Nikulin et al. 2018). However, brewing strains of *S.*  
49 *cerevisiae*, especially those in the 'Beer 1'/'Ale beer' group, are typically sterile, which impedes their  
50 use in yeast breeding (Gallone et al. 2016; De Chiara et al. 2020; Shimoi et al. 2020).

51 Yeast breeding relies on the formation and interaction of mating-competent cells (Herskowitz 1988;  
52 Neiman 2011; Merlini et al. 2013). Mating-competent cells may form when a diploid *MATa/MAT $\alpha$*  cell  
53 undergoes meiosis and produces haploid spores of either *MATa* or *MAT $\alpha$*  mating type. When two  
54 cells of opposite mating type come in contact with each other, they can undergo mating and cell  
55 fusion. Haploid cells may also switch mating type following the repair of a double-stranded break  
56 (DSB) created by the HO endonuclease at the mating type locus (Haber 2012). As the *HO* gene is  
57 repressed in diploid (or polyploid) cells heterozygous for the mating type locus (*MATa/MAT $\alpha$* ), their  
58 mating type remains stable. Such cells can, however, on rare occasions undergo loss of  
59 heterozygosity at the mating type locus, which results in the formation of non-haploid mating-  
60 competent cells with a single mating type (Gunge and Nakatomi 1972; Hiraoka et al. 2000). This is  
61 often exploited for breeding of sterile strains, such as brewing strains, in a process called 'rare

62 mating' (Krogerus et al. 2017). However, spontaneous loss of heterozygosity events occur at low  
63 frequencies ( $< 10^{-4}$ ) and parent strains require selection markers to allow selection of successful  
64 crosses. Obtaining hybrids with industrial brewing strains can therefore be challenging and time-  
65 consuming.

66 To overcome these limitations, a number of engineering techniques have been developed to facilitate  
67 breeding of sterile yeast strains. Alexander et al. (Alexander et al. 2016) describe a technique that  
68 can be used to force mating-type change in *MATa/MAT $\alpha$*  cells by transformation with a plasmid  
69 carrying the *HO* gene under the control of an inducible promoter and a drug-resistance marker.  
70 Fukuda et al. (Fukuda et al. 2016) describe another approach, where *MATa/MAT $\alpha$*  cells are  
71 transformed with a plasmid carrying either the *a1* or *a2* gene from the mating-type locus together  
72 with drug-resistance markers with promoters specific to either the *MATa1* or *MATa2* gene products.  
73 Recently, the CRISPR/Cas9 system was also used to force mating-type changes in diploid cells by  
74 creating DSBs in the mating-type locus using a Cas9 enzyme (Xie et al. 2018). As the approach  
75 was, to our knowledge, only tested on heterothallic (*ho*) laboratory strains with a maximum ploidy of  
76 two, we wished to explore whether it could be applied to industrial brewing strains, which are  
77 homothallic and aneuploid (often with DNA contents close to tetraploid).

78 In this study, we therefore applied the CRISPR-based mating-type switching process developed by  
79 Xie et al. (Xie et al. 2018) to industrial brewing strains in the hope of isolating variants with a stable  
80 single mating-type. Furthermore, we ultimately wanted to use these stable single mating-type  
81 variants to readily generate hybrids between industrial brewing strains. As a proof of concept, we  
82 aimed to generate yeast hybrids with increased  $\beta$ -lyase activity for fermentation of beer with  
83 enhanced hop flavour from released thiols. Recent studies have highlighted the important  
84 contribution of volatile thiols to fruity hop aroma in beer (Gros et al. 2012; Cibaka et al. 2017;  
85 Dennenlöhner et al. 2020). These compounds are present in minute amounts, but are still perceivable  
86 thanks to low odour thresholds (Holt et al. 2019). In addition to these free thiols, a large fraction of  
87 the total thiols in hops are found in glutathionylated or cysteinylated form (Gros et al. 2012; Roland  
88 et al. 2016). These conjugated thiols do not impact aroma by themselves, but may transfer to wort  
89 during the brewing process. Therein, a volatile thiol may be enzymatically released from the  
90 conjugated thiol through  $\beta$ -lyase activity (Roncoroni et al. 2011). Hence, a beer fermented with a  
91 yeast strain high in  $\beta$ -lyase activity is expected to contain higher levels of volatile thiols than one  
92 from a strain with low activity.

93 Here, a set of 38 *S. cerevisiae* strains were first phenotypically and genetically screened in order to  
94 identify potential parent strains with high  $\beta$ -lyase activity. We then generated mating-competent  
95 transformants of eight parent strains with either *MATa* or *MAT $\alpha$*  mating-types. These were then used

96 to generate over 60 hybrids that were screened for  $\beta$ -lyase activity. As multiple parent strains were  
97 POF+ (phenolic off-flavour positive), a selection of hybrids were further sporulated to generate  
98 meiotic segregants lacking the POF trait. A range of hybrid segregants were obtained with high  $\beta$ -  
99 lyase activity, efficient wort fermentation and lack of POF; all traits that are desirable in strains for  
100 the fermentation of modern hop-forward beers. Our study demonstrates the power of combining the  
101 CRISPR/Cas9 system with classic yeast breeding to facilitate development and diversification of  
102 brewing yeast.

## 103 **Materials and methods**

### 104 ***Yeast strains***

105 A list of strains used in this study is available in Supplementary Table S1.

### 106 ***High-throughput phenotypic assays***

107  $\beta$ -lyase activity was estimated by measuring growth on various nitrogen sources containing carbon-  
108 sulfur bonds: cysteine, s-methylcysteine and cys-4MMP (synthesized according to Howell et al.  
109 (2004)). Media contained 0.17% Yeast Nitrogen Base without  $(\text{NH}_4)_2\text{SO}_4$  and amino acids, 1%  
110 glucose, 0.01% pyridoxal 5-phosphate, and 15 mM of the above listed nitrogen sources. Growth  
111 assays were carried out in 96-well plates, with 145  $\mu\text{L}$  media per well. Wells were inoculated (to a  
112 starting OD600 value of 0.1) with 5  $\mu\text{L}$  of washed pre-culture suspended in water to an OD600 value  
113 of 3. Plates were sealed with a Breathe-Easy membrane (Sigma-Aldrich, Espoo, Finland), and  
114 incubated at 25 °C for one week. OD600 values were measured on a VarioSkan plate reader  
115 (Thermo Scientific, USA), while cysteine content of the growth media was estimated using DTNB  
116 (Ellman 1958).

117 The ability to produce phenolic off-flavour was estimated using the absorbance-based method  
118 described by Mertens et al. (2017).

119 Micro-scale wort fermentations were carried out in Greiner deep-well plates containing 700  $\mu\text{L}$  of 15  
120 °P wort. Yeast was inoculated to a starting OD600 of 0.1 from washed pre-culture suspended in  
121 water to an OD600 value of 3. Fermentations were carried out for 4 days at 25 °C, after which the  
122 plates were centrifuged and the supernatant was analysed by HPLC for fermentable sugars and  
123 ethanol.

### 124 ***Cas9 plasmid construction and yeast transformations***

125 Plasmid construction was carried out using the plasmid pCC-036 as backbone (Rantasalo et al.  
126 2018). pCC-036 contains yeast codon-optimized Cas9 expressed under *TDH3p*, guiding RNA

127 (gRNA) expressed under *SNR52p*, and *hygR* for selection on hygromycin. The two gRNA  
128 protospacer sequences, GTTCTAAAAATGCCCGTGCT and CAAATCATACAGAAACACAG, were  
129 obtained from Xie et al. (2018), and target *MATa* and *MATα*, respectively. A synthetic DNA fragment  
130 with the gRNA sequence was ordered from Integrated DNA Technologies (Leuven, Belgium) as a  
131 gBlock and introduced into the plasmid with restriction enzyme-based techniques (Thermo Scientific,  
132 Vantaa, Finland). The ligated plasmid was transformed into *E. coli* TOP10 by electroporation, and  
133 plasmid correctness was confirmed by Sanger sequencing.

134 Yeast transformations were performed using an optimized stationary phase transformation protocol  
135 (Tripp et al. 2013). Overnight yeast cultures were pelleted and incubated with 100 mM DTT for 20  
136 min at 42 °C. A lithium acetate-based transformation mix was added, together with 1 µg of purified  
137 plasmid, and cells were transformed at 42 °C for 40 minutes. The transformed cells were selected  
138 on plates containing 400 mg/L Hygromycin B (Sigma-Aldrich, Espoo, Finland). Successful mating  
139 type change was determined by PCR as described below. Colonies from selection plates were  
140 replated three times onto YPD agar plates to encourage plasmid loss, after which they were stored  
141 at – 80 °C.

#### 142 ***PCR to confirm mating type change and hybridizations***

143 The mating type locus was amplified with PCR using the previously published primers: MAT-R  
144 (AGTCACATCAAGATCGTTTATGG), MATa-F (ACTCCACTTCAAGTAAGAGTTTG) and MATα-F  
145 (GCACGGAATATGGGACTACTTCG) (Huxley et al. 1990). These primers amplify a 404-bp  
146 fragment for *MATα*, and a 544-bp fragment for *MATa*. In addition, the presence of HMLα (new  
147 primers designed) and HMRa (Ota et al. 2018), was tested using the following primers: HMLα-F  
148 (GAATGGCACGCGGACAAAAT), HMLα-R (TGGAACACAGAAAAGAGCAGTG), HMRa-F  
149 (GTTGCAAAGAAATGTGGCATTACTCCA), HMRa-R (AGCTTTCTCTAACTTCGTTGACAAA).  
150 Interdelta fingerprints were produced using delta12 and delta21 primers from Legras and Karst  
151 (2003). PCR reactions were carried out with Phusion High-Fidelity PCR Master Mix with HF Buffer  
152 (Thermo Scientific, Vantaa, Finland) and primer concentrations of 0.5 µM. PCR products were  
153 separated and visualized on 1.0% agarose gels or on an Agilent ZAG DNA Analyzer capillary  
154 electrophoresis device.

#### 155 ***Hybridizations and selection of meiotic segregants***

156 Hybridizations between mating-competent variants were attempted by placing cells of both parent  
157 strains, with opposite mating types, adjacent to each other on a YPD agar plate with the aid of a  
158 MSM400 dissection microscope (Singer Instruments, UK). Plates were incubated at 25 °C for up to  
159 5 days, after which any emerging colonies were replated twice on fresh YPD plates to ensure single

160 colony isolates. PCR of the mating type locus and interdelta fingerprints were used to confirm  
161 successful hybridization.

162 Selected hybrids were transferred to 1% potassium acetate agar for sporulation. After 7 days of  
163 incubation at 25 °C, ascospores were digested (using Zymolyase 100T) and dissected on YPD agar  
164 using the MSM400 dissection microscope.

### 165 ***IRC7* copy number estimation by qPCR**

166 The relative copy numbers of the *IRC7* gene in selected strains was estimated with quantitative PCR  
167 of genomic DNA. Primers PF6 and PR7 from Roncoroni et al. (2011) were used for *IRC7*. Copy  
168 numbers were normalized to that of *ALG9* and *UBC6* (primers listed in Krogerus et al. (2019)). The  
169 efficiencies (E) of the qPCR assays (ranging from 1.9 to 1.94) for each primer pair were calculated  
170 using the formula  $10(-1/m)$ , where m is the slope of the line of the threshold cycle (CT)-versus-log  
171 dilution plot of the DNA template (8 pg to 8 ng input DNA) (Pfaffl 2001). The qPCR reactions were  
172 prepared with PerfeCTa SYBR® Green SuperMix (QuantaBio, Beverly, MA, USA) and 0.3 µM of the  
173 primers. The qPCR reactions were performed on a LightCycler® 480 II instrument (Roche  
174 Diagnostics, Basel, Switzerland) in four technical replicates on 1 ng template DNA. The following  
175 programme was used: pre-incubation (95 °C for 3 min), amplification cycle repeated 45 times (95 °C  
176 for 15 s, 60 °C for 30 s, 72 °C for 20 s with a single fluorescence measurement), melting curve  
177 programme (65–97 °C with continuous fluorescence measurement), and finally a cooling step to 40  
178 °C. The copy numbers of *IRC7* relative to *ALG9* and *UBC6* were calculated using the Pfaffl method  
179 (Pfaffl 2001).

### 180 ***DNA content by flow cytometry***

181 Ploidy of selected strains was measured using SYTOX Green staining and flow cytometry as  
182 described previously (Krogerus et al. 2017).

### 183 ***Whole-genome sequencing and analysis***

184 For analysis of the parent strains, sequencing reads were first obtained from NCBI-SRA (accession  
185 numbers in Supplementary Table S1). Reads were trimmed and filtered with fastp using default  
186 settings (version 0.20.1; Chen et al., 2018). Trimmed reads were aligned to a *S. cerevisiae* S288C  
187 reference genome (Engel et al. 2014) using BWA-MEM (Li and Durbin 2009), and alignments were  
188 sorted and duplicates were marked with sambamba (version 0.7.1; Tarasov et al., 2015). Variants  
189 were jointly called in all strains using FreeBayes (version 1.32; Garrison and Marth, 2012). Variant  
190 calling used the following settings: --min-base-quality 30 --min-mapping-quality 30 --min-alternate-  
191 fraction 0.25 --min-repeat-entropy 0.5 --use-best-n-alleles 70 -p 2. The resulting VCF file was filtered



192 to remove variants with a quality score less than 1000 and with a sequencing depth below 10 per  
193 sample using BCFtools (Li 2011). Variants were annotated with SnpEff (Cingolani et al. 2012).

194 For phylogenetic analysis, the variants were filtered to retain only single nucleotide polymorphisms  
195 and remove sites with a minor allele frequency less than 5%. The filtered SNP matrix was converted  
196 to PHYLIP format (<https://github.com/edgardomortiz/vcf2phylip>). A random allele was selected for  
197 heterozygous sites. A maximum likelihood phylogenetic tree was generated using IQ-TREE (version  
198 2.0.3; Nguyen et al. 2015) run with the 'GTR+G4' model and 1000 bootstrap replicates (Minh et al.  
199 2013).

200 Four hybrid strains were whole-genome sequenced at NovoGene (UK). DNA was extracted using  
201 the method described by Denis et al. (2018). Sequencing was carried out on an Illumina NovaSeq  
202 6000 instrument. The 150bp paired-end reads have been submitted to NCBI-SRA under BioProject  
203 number PRJNA740182. Analysis of the hybrid strains was carried out essentially as described  
204 above. Sequencing coverage was estimated with mosdepth (version 0.2.6; Pedersen and Quinlan  
205 2018). Chromosome copy numbers were estimated based on distribution of alternate allele  
206 frequencies, ploidy as measured by flow cytometry, and sequencing coverage.

## 207 ***Wort fermentations***

208 Lab-scale wort fermentations were first carried out in triplicate to screen the yeast hybrids in order  
209 to identify top-performing strains that were able to rapidly attenuate wort sugars. To do this, overnight  
210 cultures of the yeast hybrids were set up by inoculating single colonies in 10 mL wort. These were  
211 then incubated at 25 °C with shaking (120 rpm) for 24 hours. The optical density (OD<sub>600</sub>) of the  
212 overnight cultures was measured and the cultures were diluted into 400 mL 10 °P wort (made from  
213 pale barley malt and 2.4 g L<sup>-1</sup> of Cascade hops) in 500 mL glass bottles to a starting OD<sub>600</sub> value  
214 of 0.3 as previously described by Mertens et al. (2015). The bottles were fitted with airlocks and were  
215 incubated at 25 °C. Specific gravity readings of the fermenting wort were taken daily for 7 days using  
216 the DMA 35 handheld density meter (Anton Paar GmbH, Austria).

217 2L-scale wort fermentations were carried out in 3-L cylindroconical stainless steel fermenting  
218 vessels, containing 2 L of 15 °P wort. Yeast was propagated in autoclaved wort. The 15 °P wort  
219 (70.5 g maltose, 21 g maltotriose, 19 g glucose, and 4.6 g fructose per liter) was produced at the  
220 VTT Pilot Brewery from barley malt and contained 2.5 g L<sup>-1</sup> each of Cascade and Perle hops added  
221 to the whirlpool. The wort was oxygenated to 10 mg L<sup>-1</sup> prior to pitching (Oxygen Indicator Model  
222 26073 and Sensor 21158; Orbisphere Laboratories, Switzerland). Yeast was inoculated at a rate of  
223 15 × 10<sup>6</sup> viable cells mL<sup>-1</sup>, together with 2.5 g L<sup>-1</sup> each of Cascade and Perle hops (dry hopping).

224 The fermentations were carried out in triplicate at 20 °C until no change in alcohol level was observed  
225 for 24 h or for a maximum of 9 days.

226 Wort samples were drawn regularly from the fermentation vessels aseptically and placed directly on  
227 ice, after which the yeast was separated from the fermenting wort by centrifugation (9000×g, 10 min,  
228 1 °C).

### 229 **Beer chemical analysis**

230 The specific gravity, alcohol level (% v/v), and pH of samples were determined from the centrifuged  
231 and degassed fermentation samples using an Anton Paar Density Metre DMA 5000 M with Alcolyzer  
232 Beer ME and pH ME modules (Anton Paar GmbH, Austria).

233 Concentrations of fermentable sugars (glucose, fructose, maltose, and maltotriose) and ethanol  
234 were measured by HPLC using a Waters 2695 Separation Module and Waters System Interphase  
235 Module liquid chromatograph coupled with a Waters 2414 differential refractometer (Waters Co.,  
236 Milford, MA, USA). An Aminex HPX-87H Organic Acid Analysis Column (300 × 7.8 mm; Bio-Rad,  
237 USA) was equilibrated with 5 mM H<sub>2</sub>SO<sub>4</sub> (Titrisol, Merck, Germany) in water at 55 °C, and samples  
238 were eluted with 5 mM H<sub>2</sub>SO<sub>4</sub> in water at a 0.3 mL min<sup>-1</sup> flow rate.

239 Higher alcohols and esters were determined by headspace gas chromatography with flame  
240 ionization detector (HS-GC-FID) analysis. Four-milliliter samples were filtered (0.45 μm) and  
241 incubated at 60 °C for 30 min, and then 1 mL of gas phase was injected (split mode; 225 °C; split  
242 flow of 30 mL min<sup>-1</sup>) into a gas chromatograph equipped with an FID detector and headspace  
243 autosampler (Agilent 7890 Series; Palo Alto, CA, USA). Analytes were separated on a HP-5 capillary  
244 column (50 m × 320 μm × 1.05 μm column; Agilent, USA). The carrier gas was helium (constant flow  
245 of 1.4 mL min<sup>-1</sup>). The temperature program was 50 °C for 3 min, 10 °C min<sup>-1</sup> to 100 °C, 5 °C min<sup>-1</sup>  
246 to 140 °C, 15 °C min<sup>-1</sup> to 260 °C and then isothermal for 1 min. Compounds were identified by  
247 comparison with authentic standards and were quantified using standard curves. 1-Butanol was used  
248 as internal standard.

249 4-Vinyl guaiacol was analyzed using HPLC based on methods described by Coghe et al. (2004) and  
250 McMurrugh et al. (1996). The chromatography was carried out using a Waters Alliance HPLC  
251 system consisting of a Waters e2695 Separations Module equipped with a XTerra® MS C18 column  
252 (5 μm, 4.6 × 150 mm) and a Waters 2996 Photodiode Array Detector. The mobile phase consisted  
253 of H<sub>2</sub>O/CH<sub>3</sub>OH/H<sub>3</sub>PO<sub>4</sub> (64:35:1, v/v) and flow rate was 0.5 mL min<sup>-1</sup>. The diode array detector was  
254 used at 190–400 nm. 4-Vinyl guaiacol was quantified at 260 nm using standard curves of the pure  
255 compound (0.3–10 mg L<sup>-1</sup>).



256 The volatile thiols 4-mercapto-4-methyl-2-pentanone (4MMP), 3-mercapto-1-hexanol (3MH), and 3-  
257 mercaptohexylacetate (3MHA) were determined using the method described by Dennenlöhner et al.  
258 (2020). In this method thiols are extracted and derivatized by headspace solid-phase microextraction  
259 (HS-SPME) with on-fiber derivatization (OFD) using 2,3,4,5,6-pentafluorobenzyl bromide (PFBBBr).  
260 Resulting PFBBBr-thioesters are then separated and analysed using gas chromatography tandem  
261 mass spectrometry (GC-MS/MS). The instrumental setup, parameters of sample preparation, GC-  
262 MS/MS analysis, calibration, and quantification were in full accordance to Dennenlöhner et al. (2020).  
263 Each sample was analysed in duplicate.

#### 264 **Data visualization and analysis**

265 Data and statistical analyses were performed with R (<http://www.r-project.org/>). The phylogenetic  
266 tree was produced using the 'ggtree' package (Yu et al. 2017). Flow cytometry data was analysed  
267 with 'flowCore' (Hahne et al. 2009) and 'mixtools' (Benaglia et al. 2009) packages. Scatter and box  
268 plots were produced with the 'ggpubr' package (Kassambara 2020). Variants along the genome were  
269 visualized in R using the 'karyoploter' package (Gel and Serra 2017).

## 270 **Results**

### 271 **Identifying suitable parent strains for improving $\beta$ -lyase activity**

272 As the aim of the applied part of this study was to obtain brewing yeast strains with improved  $\beta$ -lyase  
273 activity, we first performed a phenotypic and genetic pre-screening step to identify suitable parent  
274 strains to use for the CRISPR-mediated hybridizations. A set of thirty-eight *Saccharomyces*  
275 *cerevisiae* strains were included in the screening (Supplementary Table S1). Thirty-seven of these  
276 were brewing strains from Escarpment Laboratories, while the final strain, YJM1400 (or  
277 SACE\_YCM), was selected from the 1,011 yeast genomes study (Peter et al. 2018). This strain was  
278 included here, as we predicted it to have a high  $\beta$ -lyase activity based on its *IRC7* sequence and  
279 copy number. The main  $\beta$ -lyase enzyme in *S. cerevisiae* is encoded by the *IRC7* gene (Roncoroni  
280 et al. 2011; Ruiz et al. 2021). YJM1400 not only carries the more active full-length allele of *IRC7*  
281 (Roncoroni et al. 2011), but also lacks any of the widespread inactivating mutations that have  
282 recently been identified (Cordente et al. 2019), and appears to be one of the few strains in the 1,011  
283 yeast genomes study with enhanced *IRC7* copy number.

284 Using whole-genome sequence data, we first queried the presence of inactivating mutations  
285 (Cordente et al. 2019) in *IRC7* among the 38 strains. The long allele of *IRC7* was present in most  
286 strains, while the Thr185Ala missense mutation was common among the brewing strains (Figure 1).  
287 The Thr185Ala mutation could be found, for example, among all strains in the 'United Kingdom' sub-

288 clade, where it was often homozygous. Other inactivating mutations were also frequent among the  
289 tested strains, including Lys43Arg, Tyr56\*, His197Gln and Val348Leu (Cordente et al. 2019; Curtin  
290 et al. 2020). Only a handful of strains lacked any of the known inactivating mutations, and these were  
291 thus predicted to have a higher  $\beta$ -lyase activity. In addition to *IRC7*, we queried for the presence of  
292 loss-of-function mutations in *URE2*, which encodes a regulatory protein involved in nitrogen  
293 catabolite repression, which reduces *IRC7* expression (Thibon et al. 2008; Dufour et al. 2013). A  
294 group of five brewing strains were found to contain a heterozygous nonsense mutation in *URE2*  
295 (Figure 1). Presence of inactivating mutations in *URE2* have been shown to increase volatile thiol  
296 release during wine fermentations (Dufour et al. 2013).

297 In addition to the genetic pre-screening, the  $\beta$ -lyase activity of the strains was estimated by testing  
298 their growth on various cysteine-conjugates as sole nitrogen source, and by scoring aroma intensity  
299 after fermentation in wort supplemented with Cys-4MMP. In general, there was good agreement  
300 between the phenotype and genotype, as the best performing strains (e.g. YJM1400, St. Lucifer,  
301 Spooky Saison, Ardennes, and Ebbegarden) were those without or with rare heterozygous  
302 inactivating mutations. For strains containing a homozygous long allele of *IRC7*, significantly higher  
303 growth on cysteine and aroma intensity from wort supplemented with Cys-4MMP was observed in  
304 strains without any inactivating mutations compared to those with homozygous inactivating  
305 mutations (Supplementary Figure S1). Between phenotypes, moderate positive correlation was also  
306 observed between many of the measured phenotypes (Supplementary Table S2).

307 Based on these pre-screenings, we selected eight candidate parent strains for the hybridization trials  
308 (Table 1). Four of these were selected based on high predicted  $\beta$ -lyase activity in the pre-screenings,  
309 and they included YJM1400, St. Lucifer, Ardennes and Classic Wit. As the end goal was to develop  
310 yeast strains suitable for the production of IPA-style beers, where phenolic off-flavours are unwanted,  
311 the remaining four strains were selected among the pool of POF- strains. These strains were  
312 Cerberus, Ebbegarden, Foggy London and Sterling. Next, we attempted to generate mating-  
313 competent variants of these eight strains using the CRISPR/Cas9 system.

#### 314 ***Generating mating-competent variants for hybridization***

315 The eight parent strains that were selected based on pre-screenings were transformed with  
316 CRISPR/Cas9 plasmids containing protospacer sequences targeting either *MATa* and *MAT $\alpha$*  using  
317 optimized stationary phase transformation (Tripp et al. 2013). Transformation efficiencies varied  
318 broadly, with between 1 and 133 colonies emerging on the selection plates (400 mg hygromycin /  
319 mL) from the transformation of 1.5 mL saturated overnight culture (Table 1). Colonies were obtained  
320 for all 16 combinations (eight strains with two plasmids). Up to six colonies from each strain and  
321 plasmid were transferred to fresh selection plates, after which DNA was extracted and PCR was

322 used to confirm successful mating-type change (Supplementary Figure S2). Out of the 80 colonies  
323 that were tested, mating-type change from *MATa*/*MATα* to either *MATa* or *MATα* had successfully  
324 occurred in 73.

325 Next, these 73 transformants were replated twice on non-selective media (YPD without hygromycin)  
326 to encourage loss of the CRISPR/Cas9 plasmid. Plasmid loss was confirmed in 66 transformants by  
327 lack of growth when replated back to selection plates. As all eight parent strains are homothallic, we  
328 were unsure if the mating-type would remain stable after loss of the CRISPR/Cas9 plasmid. In wild-  
329 type homothallic strains, mating-type change would occur at cell division following the repair of a  
330 double-stranded break (DSB) created by the HO endonuclease at the mating type locus. We retested  
331 the mating-type of all 66 transformants lacking the CRISPR/Cas9 plasmid by PCR, and all strains  
332 still exhibited a single mating-type. Stable *MATa* and *MATα* variants were successfully obtained for  
333 all eight parent strains. The CRISPR-based mating-type switching process developed by Xie et al.  
334 (Xie et al. 2018) therefore appears to generate stable mating-competent variants even from  
335 homothallic industrial strains.

336 As the protospacer sequences used to target *MATa* and *MATα* are also present in the silent mating-  
337 type cassettes *HMRa* and *HMLα* on either end of chromosome III, we hypothesized that the stable  
338 mating-type in the transformed homothallic strains are a result of simultaneous deletion of the  
339 respective silent mating-type cassettes. To test this, we performed PCR on wild-type and  
340 transformed strains using primers designed to amplify *HMRa* and *HMLα*. Wild-type strains yielded  
341 products with both primer pairs, while transformants only yielded single products, indicating that  
342 *HMRa* and *HMLα* are indeed deleted during the mating-type switching process (Supplementary  
343 Figure S3).

#### 344 **Construction of hybrids**

345 Following the successful isolation of stable mating-competent variants of the eight selected parent  
346 strains, we proceeded with hybridization attempts (Figure 2A). From these strains, we attempted 21  
347 crosses in total. As the end goal was to obtain a yeast strain lacking the POF phenotype, each cross  
348 involved at least one POF- parent. Hybridizations were attempted by placing cells of both parent  
349 strains adjacent to one another on a YPD agar plate using a Singer MSM400 dissection microscope.  
350 16 pairs per cross were placed together. Of the 21 attempted crosses, 18 successfully yielded  
351 hybrids (for a total of 63 hybrids; Supplementary Table S3). Hybridization frequency varied  
352 considerably between the successful crosses, ranging from 6.3 to 63% (median 18.8%, average  
353 25%). Hybridization was confirmed by checking both for heterozygosity at the *MAT* locus using PCR  
354 (as both parent strains showed stable single mating types) and by producing interdelta fingerprints  
355 using PCR and capillary electrophoresis (examples in Figure 2B and C). In the interdelta fingerprints,

356 successful hybrids produced bands of both parent strains. Flow cytometry and DNA staining with  
357 SYTOX Green of selected hybrids also revealed that ploidy of the hybrid strains had increased to  
358 levels above both parent strains (Table 2). Crossing of the tetraploid strain 21 (Sterling) and diploid  
359 strain 10 (St. Lucifer), for example, resulted in a hexaploid hybrid (Figure 2D). Indeed, of the seven  
360 hybrids of which the ploidy was measured, six appeared to be approximately hexaploid.

361 After hybrids were successfully constructed and confirmed, we still attempted to remove the POF  
362 phenotype from hybrid combinations involving a POF+ parent strain through meiotic segregation.  
363 Hybrids from five crosses were spread on potassium acetate agar for sporulation. Prior to  
364 sporulation, all successful hybrids from these crosses were screened for  $\beta$ -lyase activity by testing  
365 growth on cysteine as the sole nitrogen source. The best performing hybrid from each cross was  
366 chosen for sporulation. All five hybrids sporulated efficiently and formed viable spores, with spore  
367 viability ranging from 39% to 69%. A total of 47 spore clones were obtained. The ploidy of selected  
368 spore clones was measured with flow cytometry, and it had halved compared to the F1 hybrid in  
369 most cases (Table 2).

#### 370 **Screening of constructed hybrids reveals heterosis**

371 The spore clones, along with selected F1 hybrids and parent strains were first screened for various  
372 relevant traits in microplate format. These included efficient fermentation of wort, lack of phenolic off-  
373 flavour production, and ability to grow on cysteine as a sole nitrogen source (as an indicator of  $\beta$ -  
374 lyase activity). Considerable variation was observed among the screened traits in the 60 strains  
375 (Supplementary Figure S4). We decided to focus on the Sterling  $\times$  YJM1400 hybrid (21  $\times$  41 A2) and  
376 derived spore clones in more detail. In regards to the ability to grow on and consume 15 mM cysteine  
377 as a sole nitrogen source, we observed mid-parent heterosis in the F1 hybrid and derived spore  
378 clones (Figure 3A and B). Numerous spore clones outperformed the F1 hybrid. We also measured  
379 *IRC7* copy number (normalized to the copy numbers of *ALG9* and *UBC6* that were chosen as  
380 reference genes) by quantitative PCR, and observed a moderately strong positive correlation  
381 between *IRC7* copy numbers and the measured phenotypes (Figure 3C and D).

382 The F1 hybrid and spore clones, along with the ale parent Sterling, fermented wort efficiently, with  
383 measured ethanol levels ranging from around 50-60 g/L (Figure 3E). The wild parent YJM1400 only  
384 reached 20 g ethanol/L, indicating it was unable to ferment maltose and maltotriose from the wort.  
385 Strains were grown in the presence of ferulic acid to test phenolic off-flavour (POF) formation.  
386 Greatest conversion of ferulic acid to 4-vinylguaiacol was as expected observed for the wild parent  
387 YJM1400 (Figure 3F). Interestingly, barely any drop in absorbance was observed with the F1 hybrid,  
388 despite it containing functional alleles of *PAD1* and *FDC1* from YJM1400. Similarly to the other traits,  
389 considerable variation was observed among the spore clones. *PAD1* and *FDC1* were Sanger-

390 sequenced in the fourteen strains (two parents, one F1 hybrid, and eleven spore clones) to clarify  
391 the results of the POF assay (Supplementary Figure S5). Homozygous loss-of-function (LOF)  
392 mutations in *PAD1* and *FDC1* were observed in the ale parent Sterling, as well as two out of eleven  
393 spore clones (A2 B2 and A2 C4). This ratio (0.18) corresponds well to the predicted ratio of spore  
394 clones being homozygous for the LOF mutations, assuming the spore clones are triploid and the  
395 hexaploid hybrid has four LOF alleles and two functional alleles ( $C(4,3) / C(6,3) = 0.2$ ).

396 After high-throughput screening, a total of seven hybrids and eight spore clones, along with the six  
397 parent strains, were selected for 400mL-scale wort fermentations (Figure 4A). Best-parent heterosis  
398 was observed in regards to fermentation rate, as F1 hybrids reached the mid-point of fermentation  
399 significantly faster than the parent strains (Figure 4B). F1 hybrids also reached, on average, a higher  
400 attenuation level, but the difference to the parent strains was not significant (Figure 4C). The spore  
401 clones appeared to perform on average slightly worse than the F1 hybrids in regards to fermentation  
402 rate and final attenuation, however, the difference was not significant ( $p > 0.05$ ).

#### 403 ***Confirmation of enhanced phenotype in 2L-scale wort fermentations***

404 Two F1 hybrids and two derived spore clones were selected for 2L-scale wort fermentations and  
405 more detailed phenotyping. Both hybrids involved the wild parent YJM1400, with the other parent  
406 being one of two brewing strains, Sterling or Ebbegarden. As was already observed during the  
407 smaller scale wort fermentations, the F1 hybrids exhibited best-parent heterosis in regards to  
408 fermentation rate (Figure 5A). The Sterling × YJM1400 hybrid 21 × 41 A2, for example, had reached  
409 3.9% ABV after 23 hours compared to 2.4% in Sterling ( $p = 0.001$ ). The wild parent YJM1400 was  
410 unable to utilize the maltose and maltotriose in the wort, and only reached 1.4% ABV. The  
411 fermentation profile of the Sterling × YJM1400 spore clone 21 × 41 A2 E1 was identical to the Sterling  
412 parent, while the Ebbegarden × YJM1400 spore clone 26 × 41 A3 B3 fermented slower than the F1  
413 hybrid or ale parent.

414 The concentrations of 4MMP and 3MHA in the finished beers were also measured (Figure 5B and  
415 C). A significant increase in 4MMP was observed for the Sterling × YJM1400 hybrid 21 × 41 A2  
416 compared to the parent strains ( $p < 0.05$ ), while significant increases in 3MHA were observed for  
417 both the F1 hybrids. Concentrations of both 4MMP and 3MHA were above or around the flavour  
418 threshold (1 and 4 ng/L, respectively (Capone et al. 2018)) in the beers fermented with the hybrid  
419 strains, indicating a positive influence on flavour. Interestingly, despite the high apparent  $\beta$ -lyase  
420 activity in the YJM1400 strain, the beers made with this strain had low amounts of volatile thiols. It  
421 is possible that this is a result of the limited fermentation.



422 In addition to attempting to increase thiol formation, our goal was also to decrease 4-vinylguaiacol  
423 (4VG) formation in our hybrids. The F1 hybrids and spore clones produced lower levels of 4VG than  
424 the wild *S. cerevisiae* YJM1400 parent, which was the only strain that clearly produced levels above  
425 the flavour threshold of around 0.3 mg/L (Vanbeneden et al. 2008) (Figure 5D). 4VG concentrations  
426 of the hybrid beers were marginally higher than those measured in the beers fermented with the  
427 POF- parent strains (Sterling and Ebbegarden). Concentrations of yeast-derived esters were also  
428 enhanced in several of the beers produced with the hybrid strains (Figure 6A to C). The Ebbegarden  
429 × YJM1400 spore clone 26 × 41 A3 B3, in particular, produced higher levels of 3-methylbutyl acetate,  
430 ethyl hexanoate and ethyl octanoate compared to either parent. We also measured the flocculation  
431 potential of the strains (a desirable trait in brewing strains), and it remained as high as in the ale  
432 parent for three out of the four hybrid strains (Figure 6D).

### 433 **Whole-genome sequencing of the selected hybrid strains**

434 The four hybrid strains that were studied in more detail above were whole-genome sequenced. The  
435 F1 hybrids were nearly euploid, having six copies of almost all chromosomes (Figure 7A). The spore  
436 clones had more variation in chromosome copy numbers, ranging from two to four. The F1 hybrids  
437 had high levels of heterozygosity, as over 100k heterozygous variants were identified in both hybrids  
438 (Figure 7B). Loss of heterozygosity (LOH) had occurred in the F1 spore clones, as the number of  
439 heterozygous variants decreased with approx. 20%. When the parent strains were compared to each  
440 other, a total of 50385 and 36642 variants unique to each parent were identified when Sterling and  
441 YJM1400 were compared, respectively. When Ebbegarden and YJM1400 were compared, 48157  
442 and 32509 variants unique to each parent were identified, respectively. LOH had occurred for 1222  
443 and 326 of the variants unique to Sterling and YJM1400, respectively, in the Sterling × YJM1400  
444 spore clone 21 × 41 A2 E1, as they were now homozygous (Figure 7B and C). Similarly, 1038 and  
445 1194 of the variants unique to Ebbegarden and YJM1400, respectively, were now homozygous in  
446 the Ebbegarden × YJM1400 spore clone 26 × 41 A3 B3. When plotted along the genome, these  
447 parent-specific homozygous sites were spread across the whole genome (Figure 7C).

448 In regards to the  $\beta$ -lyase encoding *IRC7* gene, we saw both differential distribution of inactivating  
449 mutations and gene copy numbers among the parent and hybrid strains (Figure 7D and E). The  
450 Sterling parent strain contained three inactivating mutations with 50% allele frequency. These  
451 mutations were detected in the derived hybrids, but at a lower allele frequency (Figure 7D). None of  
452 the known inactivating mutations in *IRC7* (Figure 1) were observed in the Ebbegarden and YJM1400  
453 parent strains, nor in their derived hybrids. *IRC7* copy numbers in the strains were estimated based  
454 on median coverage across the gene, normalized to the coverage across chromosome VI on which  
455 it is located. The copy numbers were as expected highest in the F1 hybrids, but decreased in the



456 spore clones (Figure 7E). Nevertheless, *IRC7* copy numbers in the spore clones appeared higher  
457 than in the respective ale parent from which they were derived. A moderate positive correlation ( $r =$   
458 0.65) was observed between *IRC7* copy numbers and amount of 4MMP in the beers fermented with  
459 the strains.

## 460 **Discussion**

461 Breeding with brewing yeast can be challenging, as most strains sporulate poorly or are unable to  
462 form viable spores (Gallone et al. 2016; De Chiara et al. 2020). Such strains can be bred with 'rare  
463 mating' (Gunge and Nakatomi 1972), but the approach is time-consuming and often not successful.  
464 Here, we set out to evaluate whether breeding of sterile industrial strains can be facilitated using  
465 CRISPR/Cas9-aided mating-type switching (Xie et al. 2018). Our results reveal that single mating  
466 type variants of industrial polyploid strains can indeed be readily generated and isolated.  
467 Interestingly, the mating type remained stable even after loss of the Cas9 plasmid, despite the strains  
468 being homothallic. Wild-type homothallic strains would, by action of the *HO*-coded endonuclease,  
469 switch mating type at cell division, and subsequently self-mate to reform a cell heterozygous at the  
470 mating type locus (Merlini et al. 2013). Here, no such mating type switching was observed, likely  
471 from the simultaneous loss of the silent mating type cassettes during the Cas9 transformations. This  
472 allows for the easy construction and maintenance of a library of mating-competent variants for large-  
473 scale breeding projects.

474 The single mating type variants readily mated with cells of opposite mating type, which allowed rapid  
475 construction of a large set of intraspecific hybrids. Numerous studies have demonstrated how  
476 breeding can be used combine and enhance traits from diverse strains (Steensels et al. 2014;  
477 Krogerus et al. 2015; Mertens et al. 2015; Krogerus et al. 2016). Hence, the approach used here  
478 can accelerate and simplify brewing yeast development through breeding, where hybrid construction  
479 would otherwise typically be the bottleneck. Here, we also observed heterosis for a number of traits  
480 in multiple hybrids, including fermentation rate and aroma formation. While not tested here, it is likely  
481 that the same approach, following modification of the protospacer sequences, could be applied to  
482 other *Saccharomyces* species as well to allow construction of interspecific hybrids. Furthermore,  
483 hybrids could also likely be retransformed to form mating-competent cells that could be bred with  
484 another parent strain. This would allow construction of multi-parent complex hybrids, such as those  
485 described by Peris et al. (2020).

486 Here, we aimed specifically at enhancing the  $\beta$ -lyase of selected brewing yeast strains. Volatile thiols  
487 have a central role in contributing fruity hop aroma in beer, and they typically are abundant in modern  
488 heavily-hopped IPA-style beers (Gros et al. 2012; Cibaka et al. 2017; Dennenlöhner et al. 2020;

489 Bonnaffoux et al. 2021). As the vast majority of all thiols in hops are cysteine- or glutathione-  
490 conjugated, and therefore odorless, there exists a large potential pool of aroma that can be freed  
491 from  $\beta$ -lyase activity, such as by *Irc7p* (Roncoroni et al. 2011; Roland et al. 2016). Here, we observed  
492 a variable distribution of inactivating mutations in *IRC7* among the screened brewing strains and  
493 hybrids, as well as *IRC7* copy number variations between parents, hybrids and spore clones. These  
494 mutations have been demonstrated to directly influence wine thiol levels (Cordente et al. 2019).  
495 However, we only observed a minor, but positive, effect on beer thiol levels. A similar observation  
496 regarding lack of correlation between *IRC7* mutations and beer thiols levels was found in a recent  
497 study (Michel et al. 2019). It is possible that beer environment is not optimal for  $\beta$ -lyase activity, but  
498 that requires further clarification. Indeed, a recent study showed variation in amount of thiols released  
499 from supplemented glutathionylated and cysteinylated forms based on wort extract levels and  
500 fermentation temperature, but maximum release ratio for the bound forms remained below 0.5% and  
501 0.1%, respectively (Chenot et al. 2021). Nevertheless, we succeeded in our goal of enhancing thiol  
502 release through breeding. Beer yeasts with enhanced  $\beta$ -lyase activity could help brewers heighten  
503 the flavour of popular beer styles such as “hazy” IPA, and/or reduce the cost impact of modern IPA  
504 hopping rates.

505 The use of genetically modified yeast for beverage production is still prohibited in most parts of the  
506 world, and the hybrid strains generated are considered genetically modified (Alperstein et al. 2020).  
507 However, the strains can be considered cisgenic or self-cloned, as no exogenous DNA is present in  
508 the cells and the Cas9 enzyme has only been used to create a DSB in the mating type locus (similarly  
509 to HO endonuclease). Hence, the strains are currently suitable for certain markets, including North  
510 America and Japan (Fischer et al. 2013). Regarding industrial suitability of the hybrids, previous  
511 yeast breeding studies have revealed that hybrid genomes may be unstable, and they can undergo  
512 substantial structural changes when repeatedly grown in a wort environment (Pérez-Través et al.  
513 2014; Mertens et al. 2015; Krogerus et al. 2018). It is therefore vital that the long-term stability of the  
514 hybrids generated here is studied, through testing performance in beer fermentation and reuse over  
515 multiple yeast pitch generations. This is particularly important as polyploid strains have been shown  
516 to undergo chromosome losses during stress adaptation (Selmecki et al. 2015; Scott et al. 2017;  
517 Krogerus et al. 2018). Furthermore, suitability of these strains in combination with different hop  
518 varieties for production of aroma-forward beers has not yet been explored and may yield further  
519 insight into the aroma-enhancing potential of these yeasts.

520 In conclusion, our study confirms that CRISPR/Cas9-aided mating-type switching can be applied to  
521 homothallic aneuploid industrial yeast strains, and the switched strains can be readily mated to form  
522 hybrids. This allows for the rapid breeding of brewing strains, and overcomes the bottleneck caused  
523 by their sterility and polyploidy. The brewing hybrids constructed here exhibited heterosis across a

524 variety of traits, including fermentation performance and aroma formation. Our results corroborate  
525 previous research highlighting the power of yeast breeding for strain development.

526

527 **Acknowledgements**

528 We thank Aila Siltala, Niklas Fred, Eero Mattila and Ronja Eerikäinen for technical assistance,  
529 Dominik Mojzita for preparing the Cas9 plasmids, and George van der Merwe for sharing genome  
530 sequencing data.

531

532 **Declarations**

533 ***Funding***

534 The study was funded by Eurostars Project E!113904, with Canadian contributions from NRC-IRAP  
535 No. 944030 and Finnish contributions from Business Finland.

536 ***Conflicts of interest***

537 Kristoffer Krogerus was employed by VTT Technical Research Centre of Finland Ltd. Eugene  
538 Fletcher and Richard Preiss were employed by Escarpment Laboratories Inc. Nils Rettberg was  
539 employed by VLB Berlin. The funders had no role in study design, data collection and analysis,  
540 decision to publish, or preparation of the manuscript.

541 ***Availability of data and material***

542 The Illumina reads generated in this study have been submitted to NCBI-SRA under BioProject  
543 number PRJNA740182 in the NCBI BioProject database (<https://www.ncbi.nlm.nih.gov/bioproject/>).

544 ***Authors' contributions***

545 KK: Conceived the study, designed experiments, performed experiments, analysed all data, wrote  
546 the manuscript.

547 EF: Designed experiments, performed 400mL wort fermentations, edited the manuscript.

548 NR: Performed thiol analysis, edited the manuscript.

549 BG: Conceived the study, designed experiments, edited the manuscript.

550 RP: Conceived the study, designed experiments, edited the manuscript.

551 All authors read and approved the final manuscript.

552 **References**

553 Alexander WG, Peris D, Pfannenstiel BT, Opulente DA, Kuang M, Hittinger CT (2016) Efficient  
554 engineering of marker-free synthetic allotetraploids of *Saccharomyces*. *Fungal Genet Biol*  
555 89:10–17 . <https://doi.org/10.1016/j.fgb.2015.11.002>

556 Alperstein L, Gardner JM, Sundstrom JF, Sumbly KM, Jiranek V (2020) Yeast bioprospecting  
557 versus synthetic biology—which is better for innovative beverage fermentation? *Appl*  
558 *Microbiol Biotechnol* 104:1939–1953 . <https://doi.org/10.1007/s00253-020-10364-x>

559 Aquilani B, Laureti T, Poponi S, Secondi L (2015) Beer choice and consumption determinants  
560 when craft beers are tasted: An exploratory study of consumer preferences. *Food Qual Prefer*

- 561 41:214–224 . <https://doi.org/10.1016/j.foodqual.2014.12.005>
- 562 Benaglia T, Chauveau D, Hunter DR, Young D (2009) mixtools: An R Package for Analyzing Finite  
563 Mixture Models. *J Stat Softw* 32:1–29 . <https://doi.org/10.18637/jss.v032.i06>
- 564 Bonnafeux H, Roland A, Schneider R, Cavelier F (2021) Spotlight on release mechanisms of  
565 volatile thiols in beverages. *Food Chem* 339:127628 .  
566 <https://doi.org/10.1016/j.foodchem.2020.127628>
- 567 Capone DL, Barker A, Williamson PO, Francis IL (2018) The role of potent thiols in Chardonnay  
568 wine aroma. *Aust J Grape Wine Res* 24:38–50 . <https://doi.org/10.1111/ajgw.12294>
- 569 Carbone A, Quici L (2020) Craft beer mon amour: an exploration of Italian craft consumers. *Br*  
570 *Food J* 122:2671–2687 . <https://doi.org/10.1108/BFJ-07-2019-0476>
- 571 Chen S, Zhou Y, Chen Y, Gu J (2018) fastp: an ultra-fast all-in-one FASTQ preprocessor.  
572 *Bioinformatics* 34:i884–i890 . <https://doi.org/10.1093/bioinformatics/bty560>
- 573 Chenot C, Thibault de Chanvalon E, Janssens P, Collin S (2021) Modulation of the Sulfanylalkyl  
574 Acetate/Alcohol Ratio and Free Thiol Release from Cysteinylated and/or Glutathionylated  
575 Sulfanylalkyl Alcohols in Beer under Different Fermentation Conditions. *J Agric Food Chem*  
576 69:6005–6012 . <https://doi.org/10.1021/acs.jafc.1c01610>
- 577 Cibaka M-LK, Ferreira CS, Decourrière L, Lorenzo-Alonso C-J, Bodart E, Collin S (2017) Dry  
578 Hopping with the Dual-Purpose Varieties Amarillo, Citra, Hallertau Blanc, Mosaic, and Sorachi  
579 Ace: Minor Contribution of Hop Terpenol Glucosides to Beer Flavors. *J Am Soc Brew Chem*  
580 75:122–129 . <https://doi.org/10.1094/ASBCJ-2017-2257-01>
- 581 Cingolani P, Platts A, Wang LL, Coon M, Nguyen T, Wang L, Land SJ, Lu X, Ruden DM (2012) A  
582 program for annotating and predicting the effects of single nucleotide polymorphisms, SnpEff:  
583 SNPs in the genome of *Drosophila melanogaster* strain w1118; iso-2; iso-3. *Fly (Austin)* 6:80–  
584 92 . <https://doi.org/10.4161/fly.19695>
- 585 Coghe S, Benoot K, Delvaux F, Vanderhaegen B, Delvaux FR (2004) Ferulic acid release and 4-  
586 vinylguaiacol formation during brewing and fermentation: indications for feruloyl esterase  
587 activity in *Saccharomyces cerevisiae*. *J Agric Food Chem* 52:602–608 .  
588 <https://doi.org/10.1021/jf0346556>
- 589 Cordente AG, Borneman AR, Bartel C, Capone D, Solomon M, Roach M, Curtin CD (2019)  
590 Inactivating Mutations in *Irc7p* Are Common in Wine Yeasts, Attenuating Carbon-Sulfur  $\beta$ -  
591 Lyase Activity and Volatile Sulfur Compound Production. *Appl Environ Microbiol* 85: .

- 592 <https://doi.org/10.1128/AEM.02684-18>
- 593 Curtin C, Vega E, Cordente T, Fortmann K (2020) Mutations in carbon-sulfur  $\beta$ -lyase encoding  
594 gene IRC7 affect the polyfunctional thiol-releasing capability of brewers yeast. In: World  
595 Brewing Congress 2020
- 596 De Chiara M, Barré B, Persson K, Chioma AO, Irizar A, Warringer J, Liti G (2020) Domestication  
597 reprogrammed the budding yeast life cycle. bioRxiv
- 598 Denis E, Sanchez S, Mairey B, Beluche O, Cruaud C, Lemainque A, Wincker P, Barbe V (2018)  
599 Extracting high molecular weight genomic DNA from *Saccharomyces cerevisiae*. Protoc Exch.  
600 <https://doi.org/10.1038/protex.2018.076>
- 601 Dennenlöhner J, Thörner S, Rettberg N (2020) Analysis of Hop-Derived Thiols in Beer Using On-  
602 Fiber Derivatization in Combination with HS-SPME and GC-MS/MS. J Agric Food Chem  
603 68:15036–15047 . <https://doi.org/10.1021/acs.jafc.0c06305>
- 604 Dufour M, Zimmer A, Thibon C, Marullo P (2013) Enhancement of volatile thiol release of  
605 *Saccharomyces cerevisiae* strains using molecular breeding. Appl Microbiol Biotechnol  
606 97:5893–5905 . <https://doi.org/10.1007/s00253-013-4739-7>
- 607 Ellman GL (1958) A colorimetric method for determining low concentrations of mercaptans. Arch  
608 Biochem Biophys 74:443–450 . [https://doi.org/10.1016/0003-9861\(58\)90014-6](https://doi.org/10.1016/0003-9861(58)90014-6)
- 609 Engel SR, Dietrich FS, Fisk DG, Binkley G, Balakrishnan R, Costanzo MC, Dwight SS, Hitz BC,  
610 Karra K, Nash RS, Weng S, Wong ED, Lloyd P, Skrzypek MS, Miyasato SR, Simison M,  
611 Cherry JM (2014) The reference genome sequence of *Saccharomyces cerevisiae*: then and  
612 now. G3 (Bethesda) 4:389–98 . <https://doi.org/10.1534/g3.113.008995>
- 613 Fischer S, Procopio S, Becker T (2013) Self-cloning brewing yeast: a new dimension in beverage  
614 production. Eur Food Res Technol 237:851–863 . <https://doi.org/10.1007/s00217-013-2092-9>
- 615 Fukuda N, Kaishima M, Ishii J, Kondo A, Honda S (2016) Continuous crossbreeding of sake yeasts  
616 using growth selection systems for a-type and  $\alpha$ -type cells. AMB Express 6:45 .  
617 <https://doi.org/10.1186/s13568-016-0216-x>
- 618 Gallone B, Steensels J, Prah T, Soriaga L, Saels V, Herrera-Malaver B, Merlevede A, Roncoroni  
619 M, Voordeckers K, Miraglia L, Teiling C, Steffy B, Taylor M, Schwartz A, Richardson T, White  
620 C, Baele G, Maere S, Verstrepen KJ (2016) Domestication and Divergence of  
621 *Saccharomyces cerevisiae* Beer Yeasts. Cell 166:1397-1410.e16 .  
622 <https://doi.org/10.1016/j.cell.2016.08.020>



- 623 Garavaglia C, Swinnen J (2018) *Economic Perspectives on Craft Beer*. Springer International  
624 Publishing, Cham
- 625 Garrison E, Marth G (2012) Haplotype-based variant detection from short-read sequencing. *arXiv*  
626 Prepr arXiv12073907 9 . <https://doi.org/arXiv:1207.3907> [q-bio.GN]
- 627 Gel B, Serra E (2017) karyoploteR: an R/Bioconductor package to plot customizable genomes  
628 displaying arbitrary data. *Bioinformatics* 33:3088–3090 .  
629 <https://doi.org/10.1093/bioinformatics/btx346>
- 630 Gonçalves M, Pontes A, Almeida P, Barbosa R, Serra M, Libkind D, Hutzler M, Gonçalves P,  
631 Sampaio JP (2016) Distinct Domestication Trajectories in Top-Fermenting Beer Yeasts and  
632 Wine Yeasts. *Curr Biol* 26:2750–2761 . <https://doi.org/10.1016/j.cub.2016.08.040>
- 633 Gonzalez Viejo C, Fuentes S (2020) Beer Aroma and Quality Traits Assessment Using Artificial  
634 Intelligence. *Fermentation* 6:56 . <https://doi.org/10.3390/fermentation6020056>
- 635 Gros J, Peeters F, Collin S (2012) Occurrence of Odorant Polyfunctional Thiols in Beers Hopped  
636 with Different Cultivars. First Evidence of an S -Cysteine Conjugate in Hop (*Humulus lupulus*  
637 L.). *J Agric Food Chem* 60:7805–7816 . <https://doi.org/10.1021/jf301478m>
- 638 Gunge N, Nakatomi Y (1972) Genetic mechanisms of rare matings of the yeast *Saccharomyces*  
639 *cerevisiae* heterozygous for mating type. *Genetics* 70:41–58
- 640 Haber JE (2012) Mating-Type Genes and MAT Switching in *Saccharomyces cerevisiae*. *Genetics*  
641 191:33–64 . <https://doi.org/10.1534/genetics.111.134577>
- 642 Hahne F, LeMeur N, Brinkman RR, Ellis B, Haaland P, Sarkar D, Spidlen J, Strain E, Gentleman R  
643 (2009) flowCore: a Bioconductor package for high throughput flow cytometry. *BMC*  
644 *Bioinformatics* 10:106 . <https://doi.org/10.1186/1471-2105-10-106>
- 645 Herskowitz I (1988) Life cycle of the budding yeast *Saccharomyces cerevisiae*. *Microbiol Rev*  
646 52:536–553
- 647 Hiraoka M, Watanabe KI, Umezu K, Maki H (2000) Spontaneous loss of heterozygosity in diploid  
648 *Saccharomyces cerevisiae* cells. *Genetics* 156:1531–1548 .  
649 <https://doi.org/10.1534/genetics.112.541.test>
- 650 Holt S, Miks MH, de Carvalho BT, Foulquié-Moreno MR, Thevelein JM (2019) The molecular  
651 biology of fruity and floral aromas in beer and other alcoholic beverages. *FEMS Microbiol Rev*  
652 43:193–222 . <https://doi.org/10.1093/femsre/fuy041>

- 653 Howell KS, Swiegers JH, Elsey GM, Siebert TE, Bartowsky EJ, Fleet GH, Pretorius IS, Barros  
654 Lopes MA (2004) Variation in 4-mercapto-4-methyl-pentan-2-one release by *Saccharomyces*  
655 *cerevisiae* commercial wine strains. *FEMS Microbiol Lett* 240:125–129 .  
656 <https://doi.org/10.1016/j.femsle.2004.09.022>
- 657 Huxley C, Green ED, Dunbam I (1990) Rapid assessment of *S. cerevisiae* mating type by PCR.  
658 *Trends Genet* 6:236 . [https://doi.org/10.1016/0168-9525\(90\)90190-H](https://doi.org/10.1016/0168-9525(90)90190-H)
- 659 Kassambara A (2020) ggpubr: “ggplot2” Based Publication Ready Plots. R package version 0.2.  
660 <https://CRAN.R-project.org/package=ggpubr>
- 661 Krogerus K, Arvas M, De Chiara M, Magalhães F, Mattinen L, Oja M, Vidgren V, Yue JX, Liti G,  
662 Gibson B (2016) Ploidy influences the functional attributes of de novo lager yeast hybrids.  
663 *Appl Microbiol Biotechnol* 100:7203–7222 . <https://doi.org/10.1007/s00253-016-7588-3>
- 664 Krogerus K, Holmström S, Gibson B (2018) Enhanced wort fermentation with de novo lager  
665 hybrids adapted to high-ethanol environments. *Appl Environ Microbiol* 84:e02302-17 .  
666 <https://doi.org/10.1128/AEM.02302-17>
- 667 Krogerus K, Magalhães F, Kuivanen J, Gibson B (2019) A deletion in the STA1 promoter  
668 determines maltotriose and starch utilization in STA1+ *Saccharomyces cerevisiae* strains.  
669 *Appl Microbiol Biotechnol* 103:7597–7615 . <https://doi.org/10.1007/s00253-019-10021-y>
- 670 Krogerus K, Magalhães F, Vidgren V, Gibson B (2015) New lager yeast strains generated by  
671 interspecific hybridization. *J Ind Microbiol Biotechnol* 42:769–78 .  
672 <https://doi.org/10.1007/s10295-015-1597-6>
- 673 Krogerus K, Seppänen-Laakso T, Castillo S, Gibson B (2017) Inheritance of brewing-relevant  
674 phenotypes in constructed *Saccharomyces cerevisiae* x *Saccharomyces eubayanus* hybrids.  
675 *Microb Cell Fact* 16:66 . <https://doi.org/10.1186/s12934-017-0679-8>
- 676 Legras JL, Karst F (2003) Optimisation of interdelta analysis for *Saccharomyces cerevisiae* strain  
677 characterisation. *FEMS Microbiol Lett* 221:249–255 . [https://doi.org/10.1016/S0378-1097\(03\)00205-2](https://doi.org/10.1016/S0378-1097(03)00205-2)
- 679 Li H (2011) A statistical framework for SNP calling, mutation discovery, association mapping and  
680 population genetical parameter estimation from sequencing data. *Bioinformatics* 27:2987–  
681 2993 . <https://doi.org/10.1093/bioinformatics/btr509>
- 682 Li H, Durbin R (2009) Fast and accurate short read alignment with Burrows-Wheeler transform.  
683 *Bioinformatics* 25:1754–1760 . <https://doi.org/10.1093/bioinformatics/btp324>

- 684 McMurrrough I, Madigan D, Donnelly D, Hurley J, Doyle A, Hennigan G, McNulty N, Smyth MR  
685 (1996) Control of Ferulic Acid and 4-Vinyl Guaiacol in Brewing. *J Inst Brew* 102:327–332 .  
686 <https://doi.org/10.1002/j.2050-0416.1996.tb00918.x>
- 687 Merlini L, Dudin O, Martin SG (2013) Mate and fuse: how yeast cells do it. *Open Biol* 3:130008 .  
688 <https://doi.org/10.1098/rsob.130008>
- 689 Mertens S, Steensels J, Gallone B, Souffriau B, Malcorps P, Verstrepen KJ (2017) Rapid  
690 Screening Method for Phenolic Off-Flavor (POF) Production in Yeast. *J Am Soc Brew Chem*  
691 75:318–323 . <https://doi.org/10.1094/ASBCJ-2017-4142-01>
- 692 Mertens S, Steensels J, Saels V, De Rouck G, Aerts G, Verstrepen KJ (2015) A large set of newly  
693 created interspecific *Saccharomyces* hybrids increases aromatic diversity in lager beers. *Appl*  
694 *Environ Microbiol* 81:8202–14 . <https://doi.org/10.1128/AEM.02464-15>
- 695 Michel M, Haslbeck K, Ampenberger F, Meier-Dörnberg T, Stretz D, Hutzler M, Coelhan M, Jacob  
696 F, Liu Y (2019) Screening of brewing yeast  $\beta$ -lyase activity and release of hop volatile thiols  
697 from precursors during fermentation. *BrewingScience* 72:179–186 .  
698 <https://doi.org/10.23763/BrSc19-26michel>
- 699 Minh BQ, Nguyen MAT, Von Haeseler A (2013) Ultrafast approximation for phylogenetic bootstrap.  
700 *Mol Biol Evol* 30:1188–1195 . <https://doi.org/10.1093/molbev/mst024>
- 701 Neiman AM (2011) Sporulation in the budding yeast *Saccharomyces cerevisiae*. *Genetics*  
702 189:737–765 . <https://doi.org/10.1534/genetics.111.127126>
- 703 Nguyen LT, Schmidt HA, Von Haeseler A, Minh BQ (2015) IQ-TREE: A fast and effective  
704 stochastic algorithm for estimating maximum-likelihood phylogenies. *Mol Biol Evol* 32:268–  
705 274 . <https://doi.org/10.1093/molbev/msu300>
- 706 Nikulin J, Krogerus K, Gibson B (2018) Alternative *Saccharomyces* interspecies hybrid  
707 combinations and their potential for low-temperature wort fermentation. *Yeast* 35:113–127 .  
708 <https://doi.org/10.1002/yea.3246>
- 709 Ota T, Kanai K, Nishimura H, Yoshida S, Yoshimoto H, Kobayashi O (2018) An efficient method for  
710 isolating mating-competent cells from bottom-fermenting yeast using mating pheromone-  
711 supersensitive mutants. *Yeast* 35:129–139 . <https://doi.org/10.1002/yea.3291>
- 712 Pedersen BS, Quinlan AR (2018) Mosdepth: quick coverage calculation for genomes and exomes.  
713 *Bioinformatics* 34:867–868 . <https://doi.org/10.1093/bioinformatics/btx699>

- 714 Pérez-Través L, Lopes CA, Barrio E, Querol A (2014) Stabilization process in *Saccharomyces* intra  
715 and interspecific hybrids in fermentative conditions. *Int Microbiol* 17:213–24 .  
716 <https://doi.org/10.2436/20.1501.01.224>
- 717 Peris D, Alexander WG, Fisher KJ, Moriarty R V., Basuino MG, Ubbelohde EJ, Wrobel RL,  
718 Hittinger CT (2020) Synthetic hybrids of six yeast species. *Nat Commun* 11:2085 .  
719 <https://doi.org/10.1038/s41467-020-15559-4>
- 720 Peter J, De Chiara M, Friedrich A, Yue J-X, Pflieger D, Bergström A, Sigwalt A, Barre B, Freel K,  
721 Llored A, Cruaud C, Labadie K, Aury J-M, Istace B, Lebrigand K, Barbry P, Engelen S,  
722 Lemainque A, Wincker P, Liti G, Schacherer J (2018) Genome evolution across 1,011  
723 *Saccharomyces cerevisiae* isolates. *Nature* 556:339–344 . [https://doi.org/10.1038/s41586-](https://doi.org/10.1038/s41586-018-0030-5)  
724 [018-0030-5](https://doi.org/10.1038/s41586-018-0030-5)
- 725 Pfaffl MW (2001) A new mathematical model for relative quantification in real-time RT-PCR.  
726 *Nucleic Acids Res* 29:45e – 45 . <https://doi.org/10.1093/nar/29.9.e45>
- 727 Rantasalo A, Kuivanen J, Penttilä M, Jäntti J, Mojzita D (2018) Synthetic Toolkit for Complex  
728 Genetic Circuit Engineering in *Saccharomyces cerevisiae*. *ACS Synth Biol* 7:1573–1587 .  
729 <https://doi.org/10.1021/acssynbio.8b00076>
- 730 Roland A, Viel C, Reillon F, Delpech S, Boivin P, Schneider R, Dagan L (2016) First identification  
731 and quantification of glutathionylated and cysteinylated precursors of 3-mercaptohexan-1-ol  
732 and 4-methyl-4-mercaptopentan-2-one in hops ( *Humulus lupulus* ). *Flavour Fragr J* 31:455–  
733 463 . <https://doi.org/10.1002/ffj.3337>
- 734 Roncoroni M, Santiago M, Hooks DO, Moroney S, Harsch MJ, Lee SA, Richards KD, Nicolau L,  
735 Gardner RC (2011) The yeast *IRC7* gene encodes a  $\beta$ -lyase responsible for production of the  
736 varietal thiol 4-mercapto-4-methylpentan-2-one in wine. *Food Microbiol* 28:926–935 .  
737 <https://doi.org/10.1016/j.fm.2011.01.002>
- 738 Ruiz J, Celis M, Martín-Santamaría M, Benito-Vázquez I, Pontes A, Lanza VF, Sampaio JP,  
739 Santos A, Belda I (2021) Global distribution of *IRC7* alleles in *Saccharomyces cerevisiae*  
740 populations: a genomic and phenotypic survey within the  
741 wine clade. *Environ Microbiol* 23:3182–3195 . <https://doi.org/10.1111/1462-2920.15540>
- 742 Scott AL, Richmond PA, Dowell RD, Selmecki AM (2017) The Influence of Polyploidy on the  
743 Evolution of Yeast Grown in a Sub-Optimal Carbon Source. *Mol Biol Evol* 34:2690–2703 .  
744 <https://doi.org/10.1093/molbev/msx205>

- 745 Selmecki AM, Maruvka YE, Richmond P a, Guillet M, Shores N, Sorenson AL, De S, Kishony R,  
746 Michor F, Dowell R, Pellman D (2015) Polyploidy can drive rapid adaptation in yeast. *Nature*  
747 519:349–352 . <https://doi.org/10.1038/nature14187>
- 748 Shimoi H, Kawamura N, Yamada M (2020) Cloning of the SPO11 gene that complements a  
749 meiotic recombination defect in sake yeast. *J Biosci Bioeng* 130:367–373 .  
750 <https://doi.org/10.1016/j.jbiosc.2020.06.005>
- 751 Steensels J, Meersman E, Snoek T, Saels V, Verstrepen KJ (2014) Large-scale selection and  
752 breeding to generate industrial yeasts with superior aroma production. *Appl Environ Microbiol*  
753 80:6965–6975 . <https://doi.org/10.1128/AEM.02235-14>
- 754 Tarasov A, Vilella AJ, Cuppen E, Nijman IJ, Prins P (2015) Sambamba: fast processing of NGS  
755 alignment formats. *Bioinformatics* 31:2032–2034 .  
756 <https://doi.org/10.1093/bioinformatics/btv098>
- 757 Thibon C, Marullo P, Claisse O, Cullin C, Dubourdieu D, Tominaga T (2008) Nitrogen catabolic  
758 repression controls the release of volatile thiols by *Saccharomyces cerevisiae* during wine  
759 fermentation. *FEMS Yeast Res* 8:1076–1086 . <https://doi.org/10.1111/j.1567-1364.2008.00381.x>
- 761 Tripp JD, Lilley JL, Wood WN, Lewis LK (2013) Enhancement of plasmid DNA transformation  
762 efficiencies in early stationary-phase yeast cell cultures. *Yeast* 30:191–200 .  
763 <https://doi.org/10.1002/yea.2951>
- 764 Vanbeneden N, Gils F, Delvaux F, Delvaux FR (2008) Formation of 4-vinyl and 4-ethyl derivatives  
765 from hydroxycinnamic acids: Occurrence of volatile phenolic flavour compounds in beer and  
766 distribution of Pad1-activity among brewing yeasts. *Food Chem* 107:221–230 .  
767 <https://doi.org/10.1016/j.foodchem.2007.08.008>
- 768 Xie Z-X, Mitchell LA, Liu H-M, Li B-Z, Liu D, Agmon N, Wu Y, Li X, Zhou X, Li B, Xiao W-H, Ding  
769 M-Z, Wang Y, Yuan Y-J, Boeke JD (2018) Rapid and Efficient CRISPR/Cas9-Based Mating-  
770 Type Switching of *Saccharomyces cerevisiae*. *G3 Genes/Genomes/Genetics* 8:173–183 .  
771 <https://doi.org/10.1534/g3.117.300347>
- 772 Yu G, Smith DK, Zhu H, Guan Y, Lam TT (2017) `ggtree`: an `r` package  
773 for visualization and annotation of phylogenetic trees with their covariates and other  
774 associated data. *Methods Ecol Evol* 8:28–36 . <https://doi.org/10.1111/2041-210X.12628>
- 775

776 **Tables**

777 **Table 1** - Colonies appearing on selection plates after transformation by Cas9 plasmid targeting  
778 *MATa* or *MATα*.

| <b>Strain</b> | <b><i>MATa</i> plasmid</b> | <b><i>MATα</i> plasmid</b> |
|---------------|----------------------------|----------------------------|
| Ardennes      | 11                         | 18                         |
| Classic Wit   | 5                          | 5                          |
| St Lucifer    | 4                          | 7                          |
| Foggy         | 4                          | 1                          |
| Sterling      | 28                         | 10                         |
| Ebbegarden    | 8                          | 13                         |
| Cerberus      | 4                          | 3                          |
| YJM1400       | 63                         | 133                        |

779

780



781 **Table 2** - Estimated ploidy of selected parent strains, hybrids and spore clones as measured by  
 782 SYTOX Green-staining and flow cytometry.

| Strain          | Type           | Ploidy     |
|-----------------|----------------|------------|
| 10. St. Lucifer | Parent strain  | 1.9 ± 0.09 |
| 17. Foggy       | Parent strain  | 4.1 ± 2.64 |
| 21. Sterling    | Parent strain  | 3.8 ± 0.18 |
| 26. Ebbegarden  | Parent strain  | 3.9 ± 0.13 |
| 36. Cerberus    | Parent strain  | 2.0 ± 0.14 |
| 41. YJM1400     | Parent strain  | 2.1 ± 0.11 |
| 21 x 10 D4      | F1 hybrid      | 6.0 ± 0.86 |
| 21 x 41 A2      | F1 hybrid      | 6.0 ± 1.29 |
| 26 x 10 D1      | F1 hybrid      | 5.5 ± 0.49 |
| 26 x 17 D3      | F1 hybrid      | 5.7 ± 1.12 |
| 26 x 41 A3      | F1 hybrid      | 5.9 ± 0.74 |
| 36 x 26 D3      | F1 hybrid      | 5.9 ± 0.93 |
| 36 x 41 A2      | F1 hybrid      | 4.0 ± 0.16 |
| 21 x 10 D4 C3   | F1 spore clone | 2.8 ± 0.13 |
| 21 x 41 A2 A3   | F1 spore clone | 2.8 ± 0.11 |
| 21 x 41 A2 B3   | F1 spore clone | 3.4 ± 0.65 |
| 21 x 41 A2 D1   | F1 spore clone | 2.9 ± 0.16 |
| 21 x 41 A2 E1   | F1 spore clone | 2.6 ± 0.12 |
| 26 x 10 D1 A2   | F1 spore clone | 5.0 ± 0.84 |
| 26 x 41 A3 B3   | F1 spore clone | 3.0 ± 0.21 |
| 36 x 41 A2 A3   | F1 spore clone | 2.1 ± 0.17 |

783

784

## 785 **Figure Legends**

786 **Figure 1** – Genetic and phenotypic screening of  $\beta$ -lyase activity in the 38 *Saccharomyces cerevisiae*  
787 included in the study. Strains are ordered based on phylogenetic relationship (maximum likelihood  
788 phylogenetic tree based on SNPs at 114700 sites, rooted with *S. cerevisiae* YJM1400 as outgroup).  
789 The phenotypic heatmap is colored blue to red based on Z-scores. The genotypic heatmap is colored  
790 from white to black based on allele frequency of the different mutations. The mutations that are  
791 colored red have been shown to decrease  $\beta$ -lyase activity, while the mutations colored green have  
792 been shown to increase  $\beta$ -lyase activity.

793 **Figure 2** – Overview of hybrid construction and confirmation. **(A)** Scheme of how parent strains were  
794 converted to mating-competent variants, which were then mated to form hybrids. **(B)** Mating type  
795 PCR to confirm hybridization. Parents produced a single band for either *MATa* or *MAT $\alpha$* , while  
796 hybrids produced both bands. **(C)** Interdelta fingerprints to confirm hybridization. Hybrids produce  
797 fingerprints containing all the bands of the parent strains. **(D)** Flow cytometry and SYTOX Green  
798 staining reveal an increased ploidy of the F1 hybrid formed between Sterling and YJM1400  
799 compared to the parent strains.

800 **Figure 3** – Phenotypic screening of Sterling  $\times$  YJM1400 hybrid and eleven spore clones. **(A)** The  
801 OD600 reached when grown on 15mM cysteine as sole nitrogen source. **(B)** The amount of cysteine  
802 consumed during the cultivations on 15mM cysteine as sole nitrogen source. **(C)** The relative *IRC7*  
803 copy number normalized to *ALG9* and *UBC6*, as determined by quantitative PCR. **(D)** The correlation  
804 between *IRC7* copy number and growth on 15mM cysteine as sole nitrogen source. **(E)** The amount  
805 of ethanol (g/L) produced from 15 °P wort in microplate fermentations. **(F)** The decrease in  
806 absorbance at 320 nm after cultivations in 100 mg/L ferulic acid. Assays were done in triplicate, and  
807 error bars represent standard deviation. 21: Sterling. 41: YJM1400.

808 **Figure 4** – Screening of parent, hybrid and spore clone strains in 400mL wort fermentations. **(A)** The  
809 apparent attenuation (%) during fermentations. Curves are colored according to strain type. Cali Ale  
810 was included as a control. **(B)** The time taken to reach 50% of the final attenuation in the different  
811 strain groups. **(C)** The final attenuation reached in the different strain groups. Groups were compared  
812 with the Wilcoxon signed-rank test, and an asterisk (\*) indicated  $p < 0.05$ . ns: not significant.  
813 Fermentations were performed in triplicate.

814 **Figure 5** – Fermentation performance and concentrations of thiols and 4-vinylguaicol in 2L-scale  
815 fermentations. **(A)** Alcohol by volume (%) during fermentations. Concentrations (ng/L) of **(B)** 4-  
816 mercapto-4-methyl-2-pentanone (4MMP), and **(C)** 3-mercaptohexylacetate (3MHA) in the beers. An

817 asterisk (\*) indicates a concentration significantly higher ( $p < 0.05$ ) than both parent strains as  
818 determined by unpaired two-tailed t-test. **(D)** Concentrations of 4-vinylguaicol (mg/L) in the beers.  
819 Different letters indicate significant differences ( $p < 0.05$ ) as determined by one-way ANOVA and  
820 Tukey's post-hoc test. Fermentations were performed in triplicate.

821 **Figure 6** – Ester concentrations and flocculation potential in 2L-scale fermentations Concentrations  
822 of (mg/L) of **(A)** 3-methylbutyl acetate, **(B)** ethyl hexanoate, and **(C)** ethyl octanoate in the beers. **(D)**  
823 Flocculation potential as determined by Helm's test. Different letters indicate significant differences  
824 ( $p < 0.05$ ) as determined by one-way ANOVA and Tukey's post-hoc test. Fermentations were  
825 performed in triplicate.

826 **Figure 7** – Whole-genome sequencing of selected hybrids and spore clones. **(A)** The estimated  
827 chromosome copy number and measured ploidy of the parent strains, hybrids and spore clones. **(B)**  
828 The amount of heterozygous and homozygous variants (compared to the *S. cerevisiae* S288C  
829 reference genome) detected in the strains. **(C)** Loss-of-heterozygosity regions where parent-specific  
830 mutations were homozygous in the spore clones (mutations were all heterozygous in the F1 hybrids).  
831 **(D)** Allele frequencies of the *IRC7* mutations in the Sterling × YJM1400 strains. **(E)** The estimated  
832 copy number of *IRC7* in the strains and correlation with beer 4MMP concentrations. Copy number  
833 was estimated based on median read coverage across *IRC7*, normalized to the read coverage  
834 across chromosome VI where the gene is located.

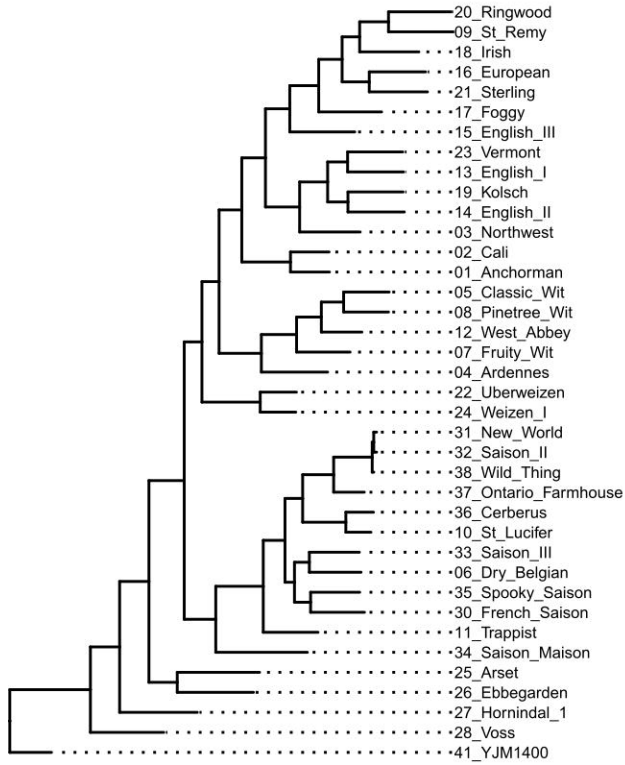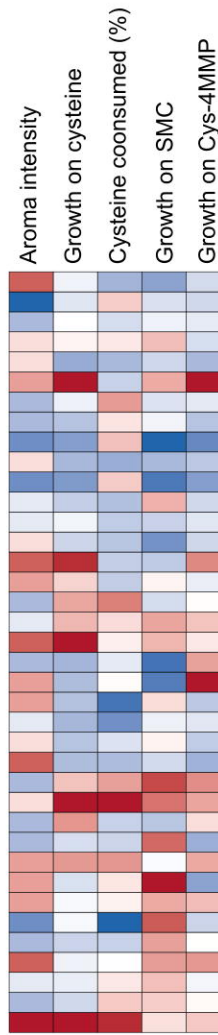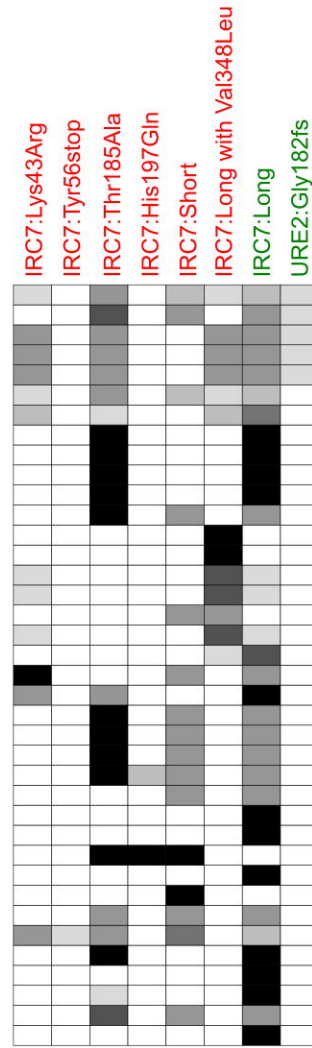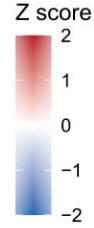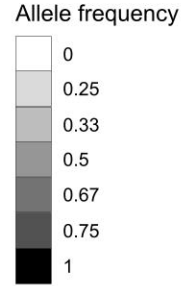

**A**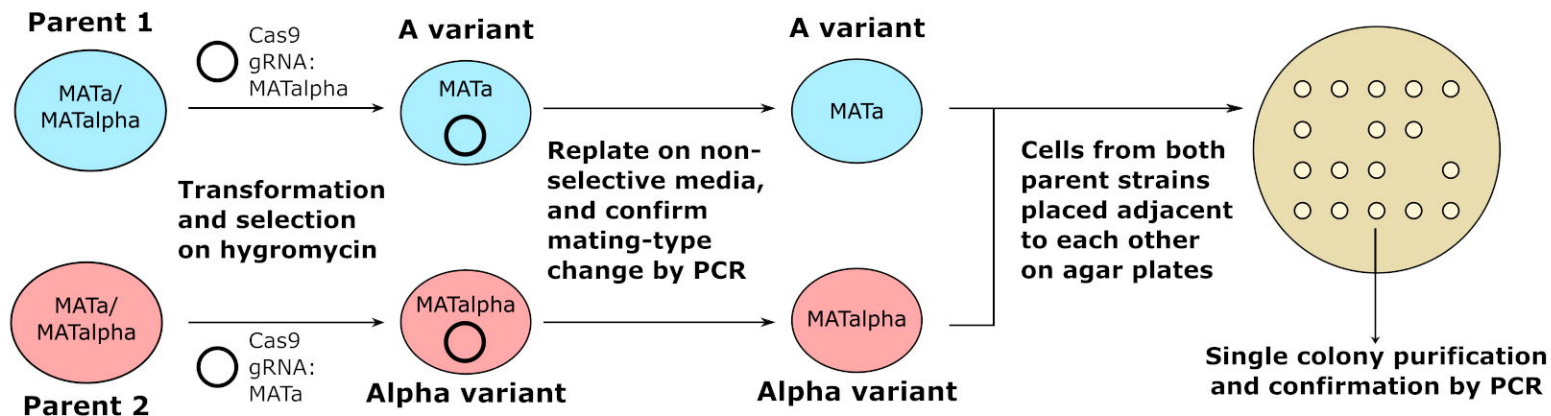**B**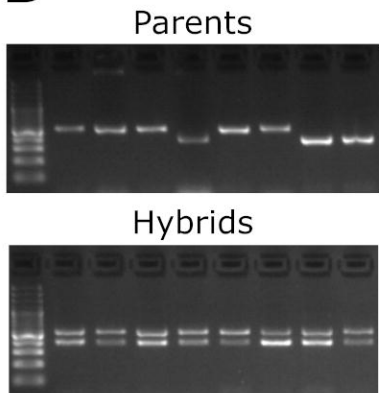

Primer pair: MAT-R - MATalpha - MATa

**C**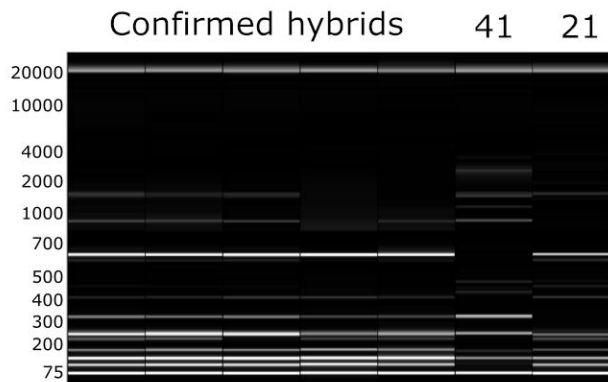

Primer pair: delta12 - delta21

**D**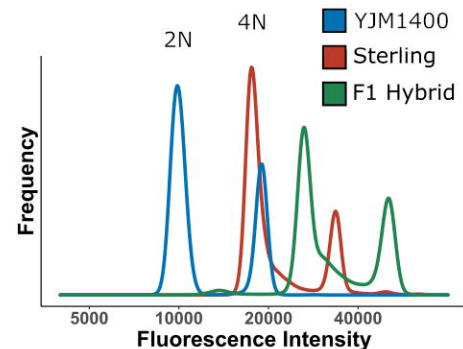

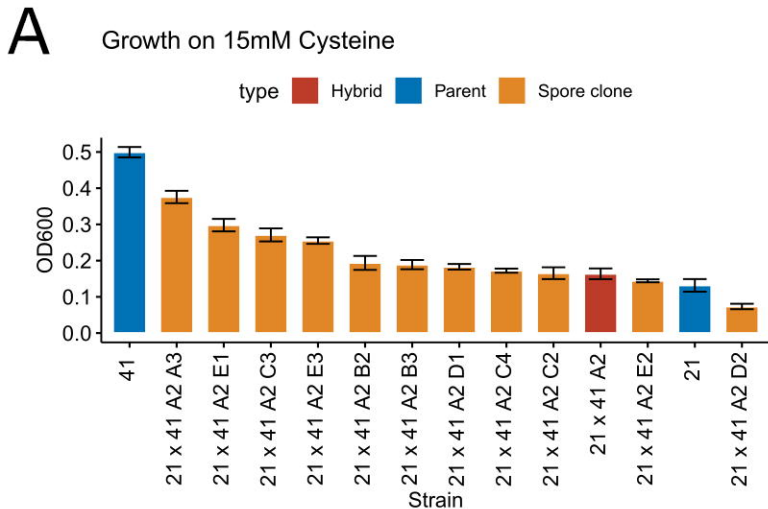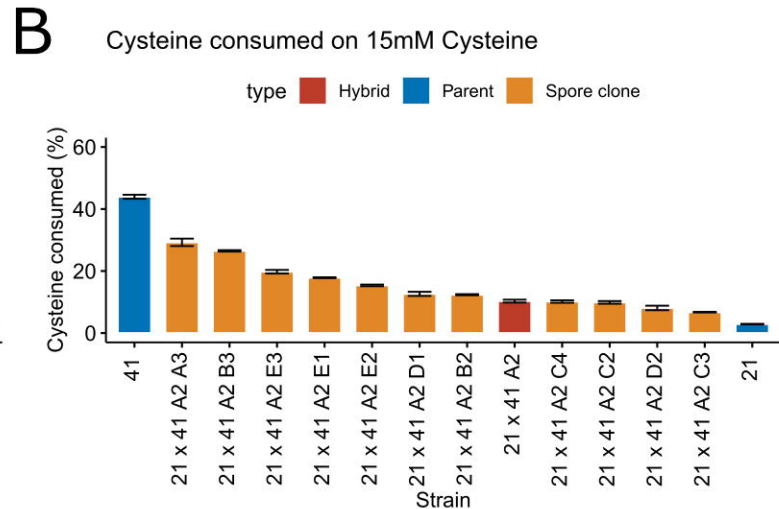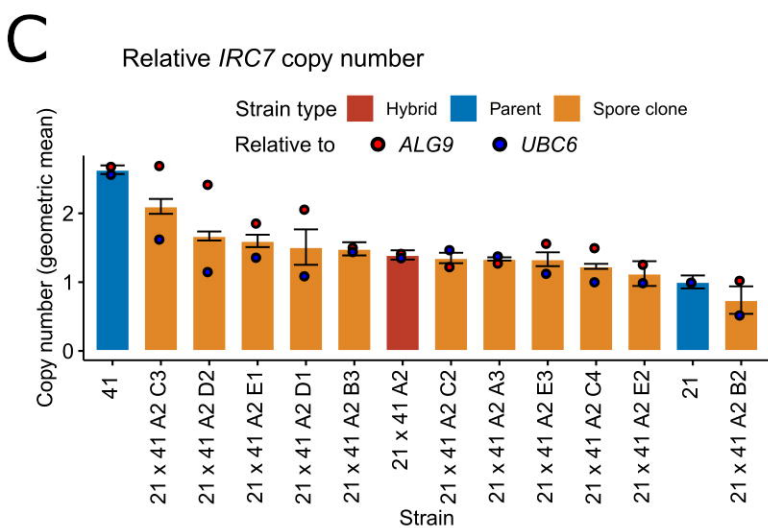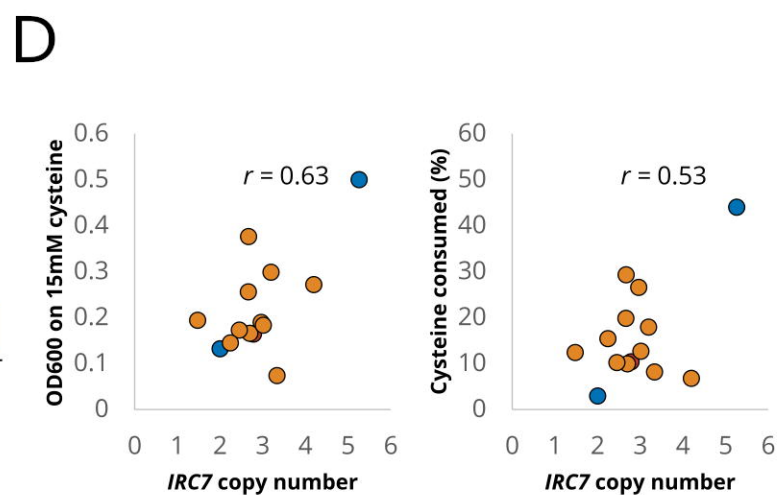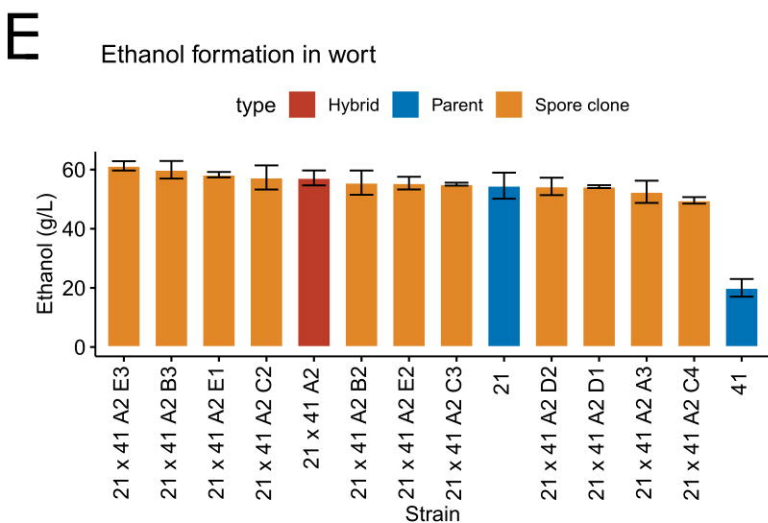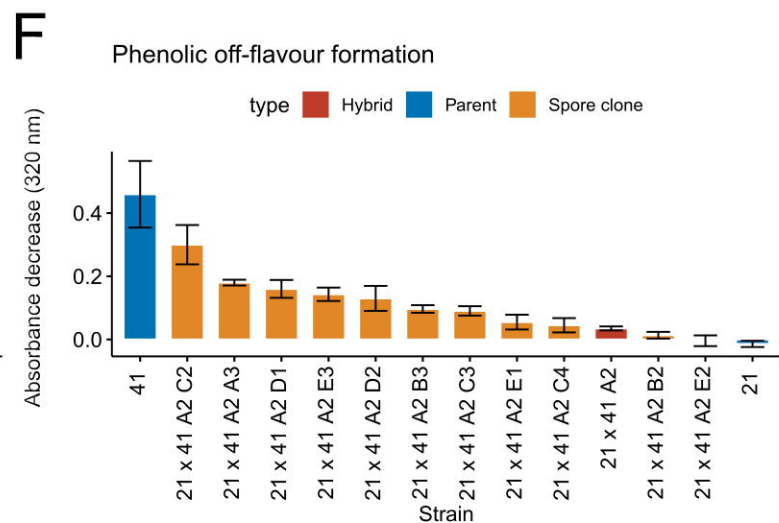



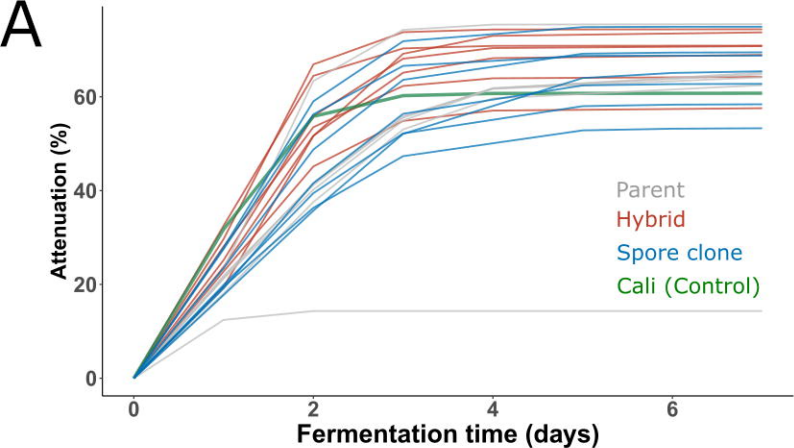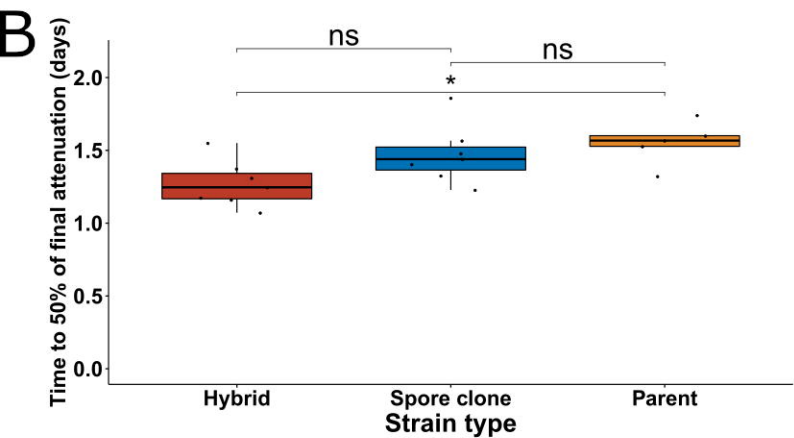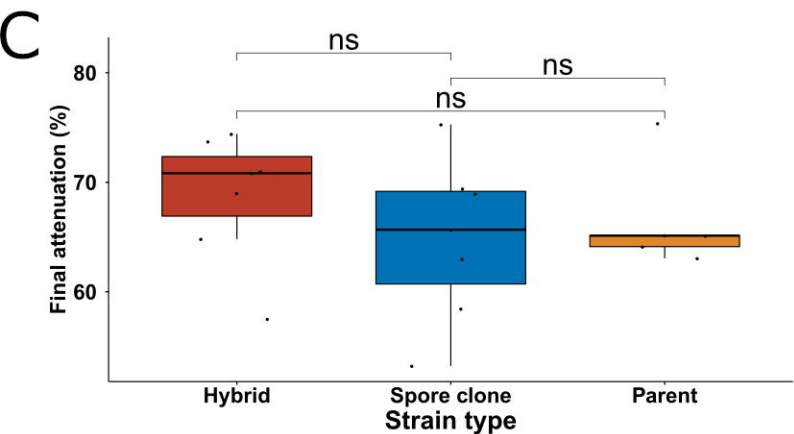

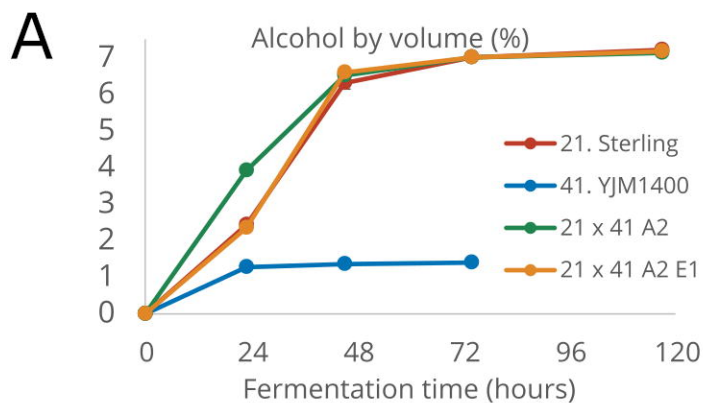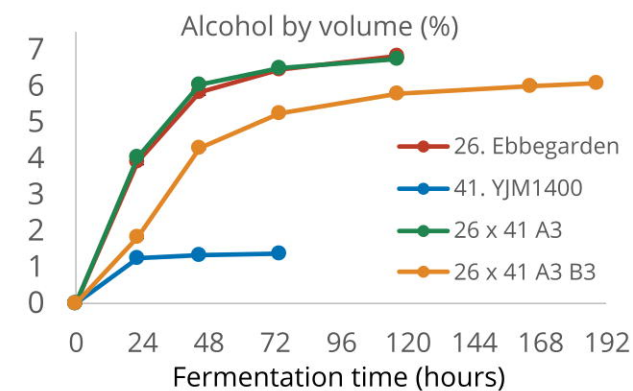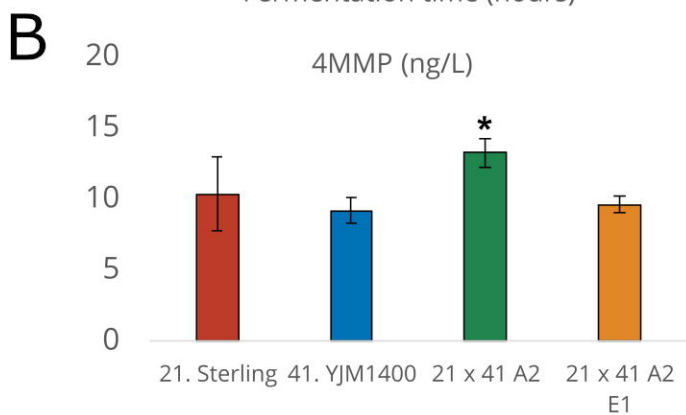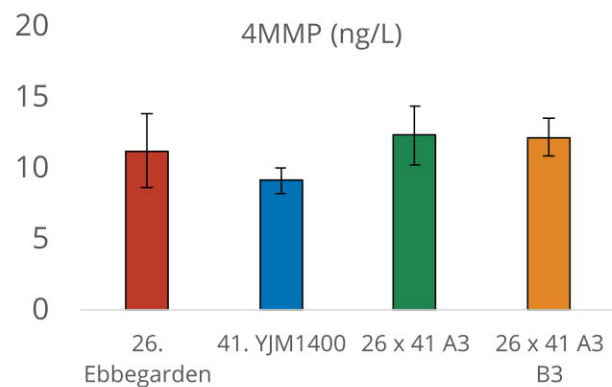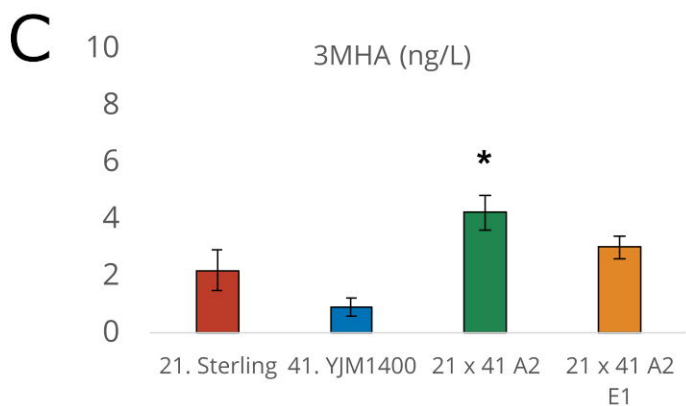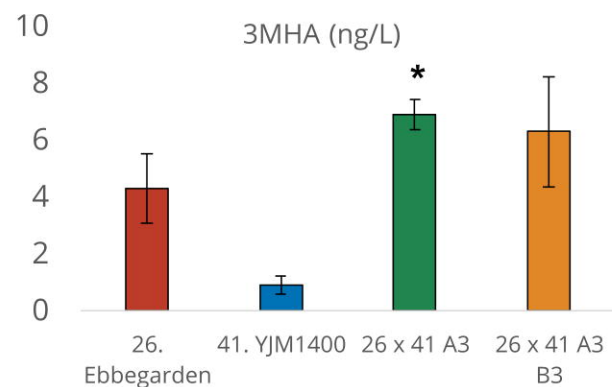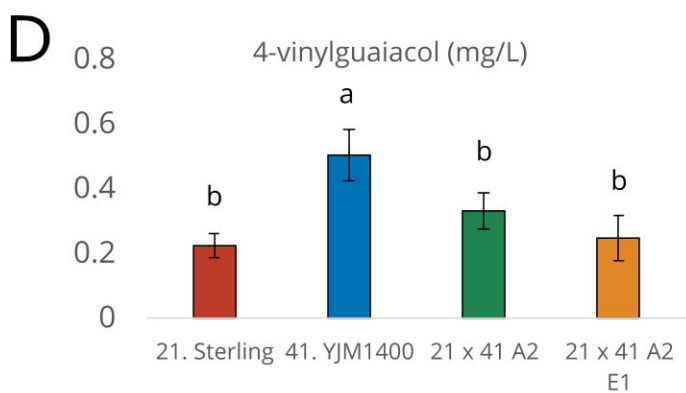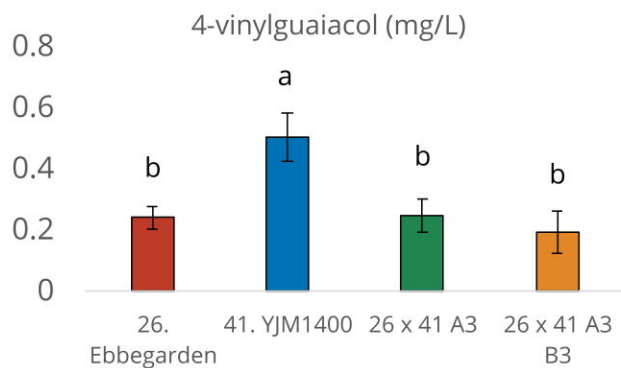

**A**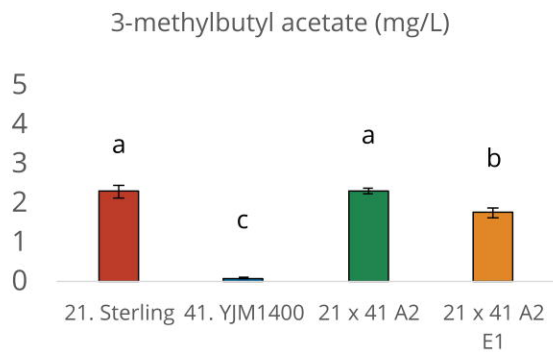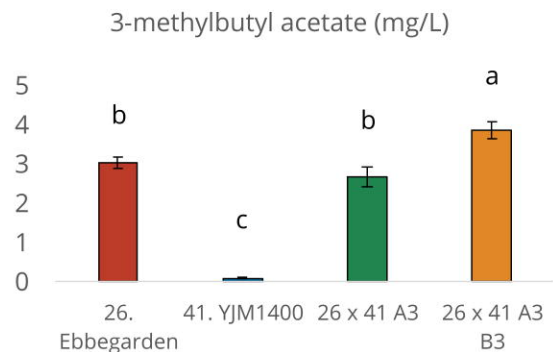**B**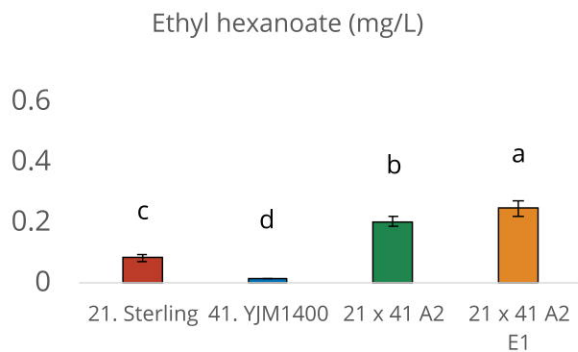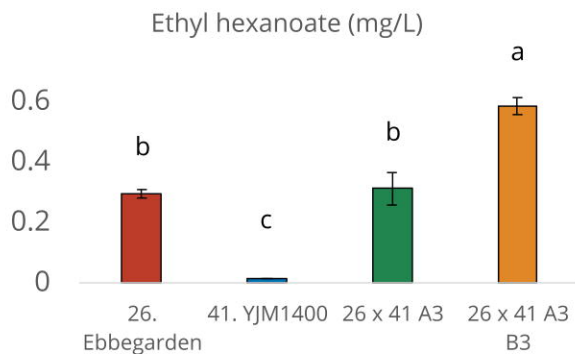**C**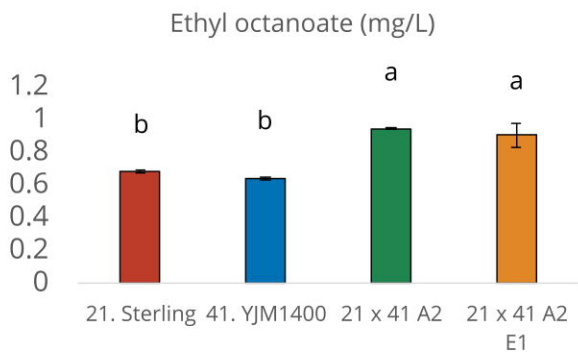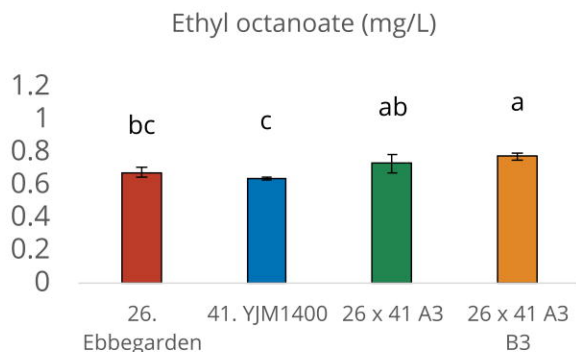**D**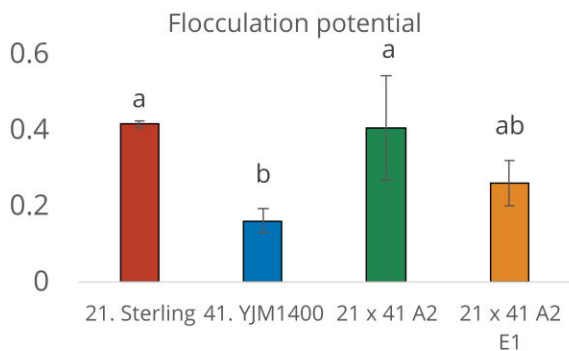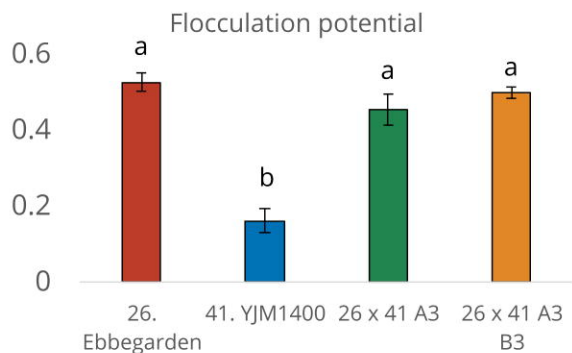

**A**

| Ploidy  | 26. Ebbegarden |                | 41. YJM1400 |            | 21 x 41 A2 E1 |            | 26 x 41 A3 B3 |  |
|---------|----------------|----------------|-------------|------------|---------------|------------|---------------|--|
|         | 21. Sterling   | 26. Ebbegarden | 41. YJM1400 | 21 x 41 A2 | 21 x 41 A2 E1 | 26 x 41 A3 | 26 x 41 A3 B3 |  |
| chrI    | 5              | 4              | 2           | 7          | 4             | 6          | 4             |  |
| chrII   | 5              | 4              | 2           | 6          | 3             | 6          | 3             |  |
| chrIII  | 4              | 3              | 2           | 6          | 3             | 6          | 3             |  |
| chrIV   | 4              | 4              | 2           | 6          | 3             | 6          | 3             |  |
| chrV    | 4              | 4              | 2           | 6          | 3             | 6          | 4             |  |
| chrVI   | 4              | 4              | 2           | 6          | 3             | 6          | 4             |  |
| chrVII  | 4              | 4              | 2           | 6          | 3             | 6          | 3             |  |
| chrVIII | 3              | 4              | 2           | 6          | 2             | 6          | 3             |  |
| chrIX   | 4              | 4              | 2           | 6          | 3             | 6          | 4             |  |
| chrX    | 3              | 4              | 2           | 6          | 2             | 6          | 4             |  |
| chrXI   | 4              | 4              | 2           | 6          | 3             | 6          | 2             |  |
| chrXII  | 4              | 4              | 2           | 6          | 3             | 6          | 2             |  |
| chrXIII | 4              | 4              | 2           | 6          | 3             | 6          | 3             |  |
| chrXIV  | 4              | 4              | 2           | 6          | 3             | 6          | 4             |  |
| chrXV   | 4              | 4              | 2           | 6          | 2             | 6          | 3             |  |
| chrXVI  | 4              | 4              | 2           | 6          | 3             | 6          | 3             |  |

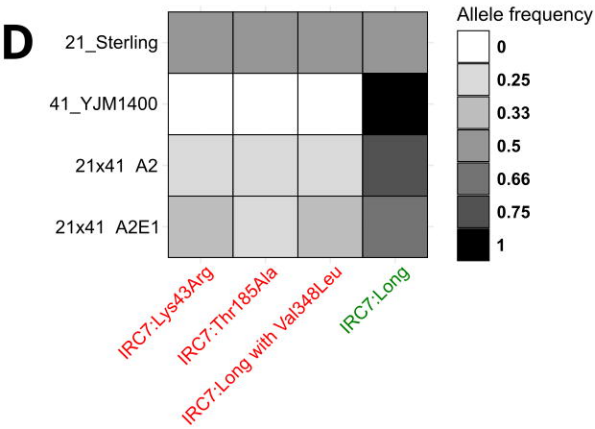

**B**

|                                                           |              | Sterling | Ebbegarden | YJM1400 | 21x41 A2 | 21x41 A2 E1 | 26x41 A3 | 26x41 A3 B3 |
|-----------------------------------------------------------|--------------|----------|------------|---------|----------|-------------|----------|-------------|
| All variants                                              | Heterozygous | 58867    | 60946      | 5491    | 107938   | 85513       | 110701   | 86249       |
|                                                           | Homozygous   | 33715    | 34189      | 72446   | 20455    | 26367       | 20513    | 27322       |
| Parent-specific variants for Sterling x YJM1400 hybrids   |              |          |            |         |          |             |          |             |
| Sterling-specific                                         | Heterozygous | 36739    | NA         | NA      | 48987    | 34920       | NA       | NA          |
|                                                           | Homozygous   | 13646    | NA         | NA      | 689      | 1876        | NA       | NA          |
| YJM1400-specific                                          | Heterozygous | NA       | NA         | 2316    | 34257    | 30810       | NA       | NA          |
|                                                           | Homozygous   | NA       | NA         | 34326   | 1642     | 1907        | NA       | NA          |
| Parent-specific variants for Ebbegarden x YJM1400 hybrids |              |          |            |         |          |             |          |             |
| Ebbegarden-specific                                       | Heterozygous | NA       | 36418      | NA      | NA       | NA          | 31592    | 24151       |
|                                                           | Homozygous   | NA       | 11739      | NA      | NA       | NA          | 390      | 1402        |
| YJM1400-specific                                          | Heterozygous | NA       | NA         | 2096    | NA       | NA          | 30333    | 26006       |
|                                                           | Homozygous   | NA       | NA         | 30413   | NA       | NA          | 1730     | 2670        |

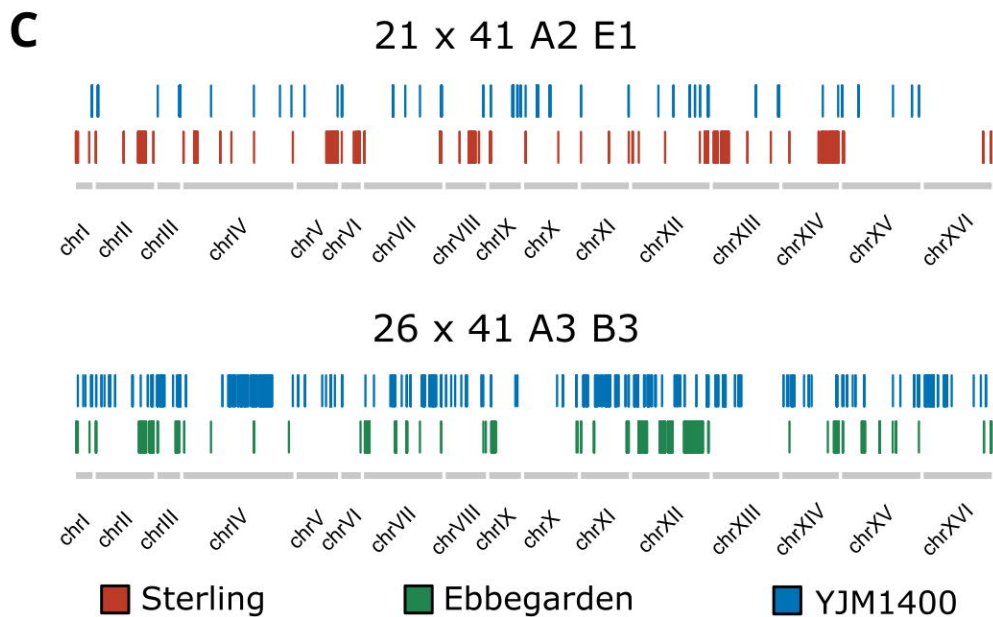

**E**

| Genotype       | IRC7 copy number |
|----------------|------------------|
| 21. Sterling   | 4.2              |
| 26. Ebbegarden | 4.1              |
| 41. YJM1400    | 7.2              |
| 21x41 A2       | 13.7             |
| 21x41 A2 E1    | 5.7              |
| 26x41 A3       | 13.2             |
| 26x41 A3 B3    | 6.2              |

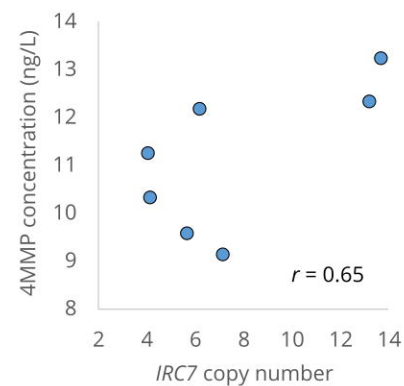

Source: https://www.biorxiv.org/content/biorxiv/early/2021/07/05/2021.07.05.450511.full.pdf
